# Supplementary material for: Source apportionment and ecotoxicity of PM 2.5 pollution events in a major Southern Hemisphere megacity: influence of a biofuel-impacted fleet and biomass burning
Source: Copernicus journal article supplement (doi:10.5194/acp-25-4587-2025), 2025-04-30
Supplement: Supplementary file 1 [file acp-25-4587-2025-supplement.zip]

## Sheet: Table S5
		Na+	NH4+	K+	Ca2+	Mg2+	Cl-	NO3-	PO43-	SO42-	C2O42-	Al	K	Ti	V	Cr	Mn	Fe	Co	Ni	Cu	Zn	As	Se	Rb	Sr	Mo	Ag	Cd	Sn	Sb	Ba	La	Ce	Tl	Pb	Bi	U	Lev	Man	Xyl	Phe	Ant	Flt	Pyr	Ret	BaA	Chr	BbF
Na+	Pearson (r)	—
	gl	—
	p-value	—
NH4+	Pearson (r)	0.068	—
	gl	85	—
	p-value	0.531	—
K+	Pearson (r)	0.175	-0.017	—
	gl	85	97	—
	p-value	0.106	0.869	—
Ca2+	Pearson (r)	0.436	-0.026	0.229	—
	gl	85	96	96	—
	p-value	< .001	0.8	0.023	—
Mg2+	Pearson (r)	0.17	-0.129	0.148	0.562	—
	gl	85	95	95	95	—
	p-value	0.115	0.207	0.149	< .001	—
Cl-	Pearson (r)	0.443	0.415	0.341	-0.044	-0.246	—
	gl	83	94	94	94	93	—
	p-value	< .001	< .001	< .001	0.668	0.016	—
NO3-	Pearson (r)	0.254	0.853	0.174	0.112	-0.099	0.502	—
	gl	85	97	97	96	95	94	—
	p-value	0.018	< .001	0.085	0.27	0.333	< .001	—
PO43-	Pearson (r)	0.481	0.124	-0.047	0.472	0.085	0.236	0.162	—
	gl	28	30	30	29	28	29	30	—
	p-value	0.007	0.5	0.797	0.007	0.655	0.2	0.375	—
SO42-	Pearson (r)	0.048	0.909	-0.05	0.08	-0.008	0.159	0.663	0.102	—
	gl	85	97	97	96	95	94	97	30	—
	p-value	0.659	< .001	0.621	0.434	0.939	0.122	< .001	0.58	—
C2O42-	Pearson (r)	0.178	0.51	0.622	0.258	0.103	0.31	0.545	0.161	0.505	—
	gl	85	97	97	96	95	94	97	30	97	—
	p-value	0.098	< .001	< .001	0.01	0.314	0.002	< .001	0.378	< .001	—
Al	Pearson (r)	0.171	-0.064	0.05	0.174	0.259	0.084	0.025	-0.452	-0.028	0.015	—
	gl	62	74	74	73	72	71	74	28	74	74	—
	p-value	0.176	0.58	0.67	0.136	0.026	0.478	0.829	0.012	0.809	0.9	—
K	Pearson (r)	0.303	0.014	0.788	0.209	-0.043	0.453	0.238	-0.133	-0.039	0.503	0.246	—
	gl	85	97	97	96	95	94	97	30	97	97	74	—
	p-value	0.004	0.89	< .001	0.039	0.679	< .001	0.018	0.467	0.705	< .001	0.032	—
Ti	Pearson (r)	0.09	-0.042	0.095	0.218	0.315	0.075	0.074	0.275	-0.005	0.121	0.717	0.233	—
	gl	85	97	97	96	95	94	97	30	97	97	74	97	—
	p-value	0.408	0.677	0.347	0.031	0.002	0.47	0.465	0.128	0.961	0.233	< .001	0.02	—
V	Pearson (r)	0.264	0.726	0.076	0.099	-0.114	0.408	0.775	-0.118	0.652	0.462	0.26	0.253	0.215	—
	gl	85	97	97	96	95	94	97	30	97	97	74	97	97	—
	p-value	0.013	< .001	0.452	0.333	0.265	< .001	< .001	0.521	< .001	< .001	0.023	0.012	0.033	—
Cr	Pearson (r)	0.242	-0.013	0.247	0.071	0.093	0.093	0.122	-0.339	0.006	0.163	0.263	0.323	0.035	0.144	—
	gl	57	60	60	60	60	59	60	13	60	60	42	60	60	60	—
	p-value	0.064	0.922	0.053	0.582	0.474	0.478	0.345	0.216	0.962	0.205	0.084	0.01	0.79	0.266	—
Mn	Pearson (r)	0.183	0.095	0.569	0.118	-0.027	0.511	0.272	-0.072	0.03	0.414	0.506	0.619	0.499	0.306	0.23	—
	gl	85	97	97	96	95	94	97	30	97	97	74	97	97	97	60	—
	p-value	0.09	0.351	< .001	0.246	0.79	< .001	0.007	0.696	0.77	< .001	< .001	< .001	< .001	0.002	0.072	—
Fe	Pearson (r)	0.027	-0.075	0.446	0.098	0.286	0.302	0.061	0.101	-0.138	0.281	0.403	0.496	0.7	0.072	0.094	0.724	—
	gl	66	76	76	76	76	75	76	20	76	76	62	76	76	76	51	76	—
	p-value	0.824	0.511	< .001	0.391	0.011	0.008	0.594	0.654	0.228	0.013	< .001	< .001	< .001	0.53	0.503	< .001	—
Co	Pearson (r)	0.075	0.198	0.403	0.021	0.059	0.337	0.327	-0.267	0.178	0.436	0.361	0.388	0.339	0.357	0.406	0.715	0.566	—
	gl	82	93	93	92	91	90	93	29	93	93	70	93	93	93	58	93	72	—
	p-value	0.498	0.055	< .001	0.837	0.575	0.001	0.001	0.146	0.085	< .001	0.002	< .001	< .001	< .001	0.001	< .001	< .001	—
Ni	Pearson (r)	-0.011	0.174	0.127	-0.012	-0.013	0.086	0.175	-0.002	0.189	0.169	0.069	0.124	0.026	0.158	0.48	0.17	0.114	0.41	—
	gl	85	97	97	96	95	94	97	30	97	97	74	97	97	97	60	97	76	93	—
	p-value	0.92	0.085	0.211	0.904	0.9	0.402	0.084	0.992	0.061	0.094	0.556	0.22	0.802	0.117	< .001	0.092	0.321	< .001	—
Cu	Pearson (r)	0.065	-0.067	0.199	0.008	-0.126	0.253	0.036	0.1	-0.128	0.364	0.067	0.345	0.249	0.078	0.122	0.335	0.296	0.189	0.003	—
	gl	85	97	97	96	95	94	97	30	97	97	74	97	97	97	60	97	76	93	97	—
	p-value	0.547	0.512	0.048	0.934	0.22	0.013	0.723	0.587	0.207	< .001	0.564	< .001	0.013	0.44	0.343	< .001	0.008	0.066	0.974	—
Zn	Pearson (r)	0.123	0.204	0.349	-0.08	-0.241	0.516	0.266	-0.055	0.151	0.361	0.04	0.403	0.073	0.272	0.081	0.694	0.398	0.634	0.14	0.22	—
	gl	85	97	97	96	95	94	97	30	97	97	74	97	97	97	60	97	76	93	97	97	—
	p-value	0.256	0.043	< .001	0.433	0.018	< .001	0.008	0.765	0.136	< .001	0.729	< .001	0.476	0.006	0.532	< .001	< .001	< .001	0.166	0.029	—
As	Pearson (r)	0.314	0.279	0.525	0.054	-0.251	0.49	0.448	-0.259	0.222	0.532	0.289	0.681	0.177	0.443	0.376	0.671	0.303	0.61	0.14	0.308	0.505	—
	gl	85	97	97	96	95	94	97	30	97	97	74	97	97	97	60	97	76	93	97	97	97	—
	p-value	0.003	0.005	< .001	0.594	0.013	< .001	< .001	0.152	0.027	< .001	0.011	< .001	0.079	< .001	0.003	< .001	0.007	< .001	0.167	0.002	< .001	—
Se	Pearson (r)	0.158	0.343	-0.01	0.182	0.078	0.158	0.413	-0.01	0.358	0.349	0.388	0.145	0.432	0.473	0.019	0.385	0.186	0.399	0.042	0.324	0.241	0.387	—
	gl	85	97	97	96	95	94	97	30	97	97	74	97	97	97	60	97	76	93	97	97	97	97	—
	p-value	0.145	< .001	0.926	0.073	0.45	0.123	< .001	0.956	< .001	< .001	< .001	0.153	< .001	< .001	0.881	< .001	0.102	< .001	0.68	0.001	0.016	< .001	—
Rb	Pearson (r)	0.394	0.089	0.806	0.195	-0.075	0.533	0.331	-0.071	0.017	0.544	0.337	0.837	0.23	0.334	0.332	0.742	0.378	0.49	0.139	0.308	0.465	0.789	0.219	—
	gl	85	97	97	96	95	94	97	30	97	97	74	97	97	97	60	97	76	93	97	97	97	97	97	—
	p-value	< .001	0.383	< .001	0.055	0.465	< .001	< .001	0.701	0.868	< .001	0.003	< .001	0.022	< .001	0.008	< .001	< .001	< .001	0.17	0.002	< .001	< .001	0.03	—
Sr	Pearson (r)	0.315	0.098	0.205	0.371	0.076	0.254	0.244	0.287	0.132	0.268	0.568	0.472	0.518	0.31	0.237	0.487	0.354	0.329	-0.016	0.302	0.172	0.542	0.379	0.453	—
	gl	84	95	95	94	93	92	95	30	95	95	72	95	95	95	59	95	74	91	95	95	95	95	95	95	—
	p-value	0.003	0.342	0.044	< .001	0.466	0.013	0.016	0.111	0.199	0.008	< .001	< .001	< .001	0.002	0.066	< .001	0.002	0.001	0.876	0.003	0.091	< .001	< .001	< .001	—
Mo	Pearson (r)	0.104	0.031	0.083	-0.076	-0.226	0.362	0.189	-0.245	-0.02	0.067	0.519	0.42	0.598	0.324	0.236	0.57	0.434	0.325	0.146	0.483	0.357	0.49	0.457	0.416	0.491	—
	gl	85	97	97	96	95	94	97	30	97	97	74	97	97	97	60	97	76	93	97	97	97	97	97	97	95	—
	p-value	0.337	0.758	0.414	0.459	0.026	< .001	0.061	0.176	0.844	0.508	< .001	< .001	< .001	0.001	0.065	< .001	< .001	0.001	0.149	< .001	< .001	< .001	< .001	< .001	< .001	—
Ag	Pearson (r)	0.262	0.148	0.366	0.079	-0.326	0.529	0.33	0.003	0.066	0.286	0.376	0.62	0.25	0.43	0.265	0.647	0.259	0.481	0.063	0.429	0.46	0.762	0.395	0.703	0.576	0.637	—
	gl	83	94	94	93	92	91	94	30	94	94	71	94	94	94	58	94	73	93	94	94	94	94	94	94	92	94	—
	p-value	0.015	0.15	< .001	0.447	0.001	< .001	0.001	0.988	0.521	0.005	0.001	< .001	0.014	< .001	0.041	< .001	0.025	< .001	0.544	< .001	< .001	< .001	< .001	< .001	< .001	< .001	—
Cd	Pearson (r)	0.325	0.196	0.648	0.047	-0.181	0.61	0.359	-0.088	0.083	0.465	0.206	0.681	0.112	0.345	0.249	0.789	0.402	0.551	0.153	0.254	0.663	0.745	0.226	0.832	0.392	0.355	0.63	—
	gl	85	97	97	96	95	94	97	30	97	97	74	97	97	97	60	97	76	93	97	97	97	97	97	97	95	97	94	—
	p-value	0.002	0.052	< .001	0.644	0.076	< .001	< .001	0.632	0.412	< .001	0.074	< .001	0.271	< .001	0.051	< .001	< .001	< .001	0.131	0.011	< .001	< .001	0.025	< .001	< .001	< .001	< .001	—
Sn	Pearson (r)	0.254	0.353	0.261	0.021	-0.098	0.356	0.44	-0.118	0.301	0.468	0.103	0.306	-0.025	0.413	0.09	0.388	0.047	0.492	0.085	0.237	0.481	0.459	0.543	0.415	0.095	0.129	0.362	0.449	—
	gl	85	97	97	96	95	94	97	30	97	97	74	97	97	97	60	97	76	93	97	97	97	97	97	97	95	97	94	97	—
	p-value	0.018	< .001	0.009	0.835	0.34	< .001	< .001	0.519	0.002	< .001	0.376	0.002	0.803	< .001	0.487	< .001	0.682	< .001	0.402	0.018	< .001	< .001	< .001	< .001	0.355	0.204	< .001	< .001	—
Sb	Pearson (r)	0.179	0.258	0.599	0.038	-0.186	0.63	0.396	0.006	0.153	0.514	0.123	0.6	0.07	0.345	0.174	0.758	0.442	0.643	0.146	0.247	0.744	0.68	0.189	0.739	0.355	0.295	0.585	0.854	0.472	—
	gl	85	97	97	96	95	94	97	30	97	97	74	97	97	97	60	97	76	93	97	97	97	97	97	97	95	97	94	97	97	—
	p-value	0.098	0.01	< .001	0.713	0.069	< .001	< .001	0.974	0.13	< .001	0.288	< .001	0.488	< .001	0.177	< .001	< .001	< .001	0.149	0.014	< .001	< .001	0.061	< .001	< .001	0.003	< .001	< .001	< .001	—
Ba	Pearson (r)	0.137	0.152	0.454	0.112	0.041	0.408	0.257	0.052	0.098	0.329	0.43	0.493	0.392	0.214	0.2	0.725	0.605	0.587	0.093	0.243	0.535	0.532	0.215	0.542	0.441	0.351	0.482	0.6	0.228	0.617	—
	gl	85	97	97	96	95	94	97	30	97	97	74	97	97	97	60	97	76	93	97	97	97	97	97	97	95	97	94	97	97	97	—
	p-value	0.204	0.134	< .001	0.273	0.692	< .001	0.01	0.779	0.335	< .001	< .001	< .001	< .001	0.034	0.119	< .001	< .001	< .001	0.36	0.015	< .001	< .001	0.032	< .001	< .001	< .001	< .001	< .001	0.024	< .001	—
La	Pearson (r)	0.041	0.341	0.33	0.062	0.008	0.4	0.4	-0.111	0.306	0.382	0.446	0.456	0.469	0.451	0.182	0.708	0.567	0.707	0.216	0.165	0.542	0.608	0.404	0.473	0.488	0.474	0.605	0.506	0.302	0.598	0.602	—
	gl	82	93	93	92	91	90	93	29	93	93	70	93	93	93	58	93	72	93	93	93	93	93	93	93	91	93	93	93	93	93	93	—
	p-value	0.713	< .001	0.001	0.553	0.938	< .001	< .001	0.553	0.003	< .001	< .001	< .001	< .001	< .001	0.164	< .001	< .001	< .001	0.035	0.11	< .001	< .001	< .001	< .001	< .001	< .001	< .001	< .001	0.003	< .001	< .001	—
Ce	Pearson (r)	0.118	0.035	0.442	0.197	0.239	0.33	0.197	0.06	0.014	0.372	0.648	0.502	0.843	0.286	0.128	0.784	0.858	0.646	0.091	0.31	0.432	0.477	0.413	0.534	0.558	0.602	0.5	0.475	0.156	0.497	0.634	0.741	—
	gl	82	93	93	92	91	90	93	29	93	93	70	93	93	93	58	93	72	93	93	93	93	93	93	93	91	93	93	93	93	93	93	93	—
	p-value	0.284	0.734	< .001	0.057	0.021	0.001	0.055	0.749	0.89	< .001	< .001	< .001	< .001	0.005	0.328	< .001	< .001	< .001	0.38	0.002	< .001	< .001	< .001	< .001	< .001	< .001	< .001	< .001	0.131	< .001	< .001	< .001	—
Tl	Pearson (r)	0.182	0.432	0.417	-0.016	-0.14	0.464	0.483	-0.084	0.373	0.603	0.02	0.388	-0.042	0.435	0.085	0.556	0.13	0.715	0.104	0.229	0.625	0.666	0.492	0.527	0.207	0.142	0.529	0.579	0.748	0.67	0.414	0.576	0.341	—
	gl	83	94	94	93	92	91	94	30	94	94	71	94	94	94	58	94	73	93	94	94	94	94	94	94	92	94	94	94	94	94	94	93	93	—
	p-value	0.095	< .001	< .001	0.875	0.177	< .001	< .001	0.647	< .001	< .001	0.869	< .001	0.685	< .001	0.52	< .001	0.267	< .001	0.312	0.025	< .001	< .001	< .001	< .001	0.045	0.167	< .001	< .001	< .001	< .001	< .001	< .001	< .001	—
Pb	Pearson (r)	0.246	0.281	0.63	0.007	-0.181	0.654	0.428	-0.074	0.177	0.531	0.025	0.628	0.037	0.389	0.165	0.752	0.416	0.604	0.136	0.256	0.825	0.696	0.217	0.73	0.275	0.324	0.575	0.839	0.537	0.831	0.563	0.498	0.429	0.692	—
	gl	85	97	97	96	95	94	97	30	97	97	74	97	97	97	60	97	76	93	97	97	97	97	97	97	95	97	94	97	97	97	97	93	93	94	—
	p-value	0.022	0.005	< .001	0.946	0.075	< .001	< .001	0.687	0.08	< .001	0.831	< .001	0.714	< .001	0.201	< .001	< .001	< .001	0.18	0.011	< .001	< .001	0.031	< .001	0.006	0.001	< .001	< .001	< .001	< .001	< .001	< .001	< .001	< .001	—
Bi	Pearson (r)	0.052	0.176	0.277	-0.015	-0.123	0.196	0.246	-0.032	0.149	0.232	0.131	0.227	0.006	0.196	0.183	0.361	0.239	0.393	0.03	0.029	0.246	0.373	0.074	0.345	0.2	0.062	0.282	0.475	0.184	0.498	0.326	0.371	0.254	0.368	0.389	—
	gl	78	90	90	89	88	87	90	28	90	90	72	90	90	90	55	90	75	87	90	90	90	90	90	90	88	90	87	90	90	90	90	87	87	87	90	—
	p-value	0.645	0.093	0.008	0.884	0.25	0.065	0.018	0.866	0.156	0.026	0.267	0.029	0.955	0.061	0.173	< .001	0.036	< .001	0.777	0.787	0.018	< .001	0.484	< .001	0.059	0.555	0.007	< .001	0.078	< .001	0.002	< .001	0.016	< .001	< .001	—
U	Pearson (r)	0.184	0.19	0.223	0.216	-0.012	0.199	0.271	0.042	0.188	0.356	0.295	0.312	0.187	0.242	0.276	0.393	0.166	0.416	-0.01	0.191	0.203	0.567	0.256	0.371	0.742	0.184	0.451	0.416	0.12	0.465	0.393	0.531	0.411	0.403	0.29	0.354	—
	gl	84	96	96	95	94	93	96	30	96	96	73	96	96	96	59	96	75	92	96	96	96	96	96	96	95	96	93	96	96	96	96	92	92	93	96	89	—
	p-value	0.09	0.061	0.027	0.034	0.911	0.053	0.007	0.821	0.064	< .001	0.01	0.002	0.066	0.016	0.031	< .001	0.15	< .001	0.923	0.059	0.045	< .001	0.011	< .001	< .001	0.07	< .001	< .001	0.239	< .001	< .001	< .001	< .001	< .001	0.004	< .001	—
Lev	Pearson (r)	0.17	-0.116	0.709	0.019	-0.052	0.359	0.037	-0.142	-0.202	0.467	0.026	0.606	0.009	-0.028	0.245	0.442	0.282	0.161	-0.011	0.409	0.266	0.493	-0.009	0.687	0.165	0.134	0.358	0.646	0.155	0.526	0.416	0.098	0.263	0.313	0.542	0.249	0.216	—
	gl	73	84	84	84	83	82	84	27	84	84	70	84	84	84	53	84	71	82	84	84	84	84	84	84	82	84	83	84	84	84	84	82	82	83	84	79	83	—
	p-value	0.145	0.287	< .001	0.863	0.639	< .001	0.733	0.462	0.063	< .001	0.828	< .001	0.937	0.801	0.072	< .001	0.016	0.145	0.921	< .001	0.013	< .001	0.937	< .001	0.133	0.219	< .001	< .001	0.154	< .001	< .001	0.376	0.016	0.004	< .001	0.025	0.047	—
Man	Pearson (r)	0.29	0.067	0.502	-0.035	-0.269	0.763	0.197	0.218	-0.142	0.212	-0.013	0.571	-0.035	0.113	0.098	0.402	0.203	0.048	-0.022	0.308	0.259	0.529	-0.048	0.715	0.162	0.281	0.527	0.654	0.087	0.567	0.342	0.097	0.174	0.235	0.554	0.205	0.092	0.699	—
	gl	65	75	75	75	74	73	75	25	75	75	64	75	75	75	47	75	67	73	75	75	75	75	75	75	73	75	74	75	75	75	75	73	73	74	75	74	74	75	—
	p-value	0.017	0.563	< .001	0.762	0.019	< .001	0.087	0.275	0.219	0.064	0.92	< .001	0.763	0.326	0.503	< .001	0.095	0.68	0.85	0.006	0.023	< .001	0.679	< .001	0.166	0.013	< .001	< .001	0.45	< .001	0.002	0.406	0.134	0.041	< .001	0.076	0.428	< .001	—
Xyl	Pearson (r)	0.065	-0.106	0.483	0.086	0.308	0.028	-0.079	0.048	-0.092	0.268	-0.085	0.28	0.184	-0.104	0.088	0.201	0.375	-0.003	0.042	0.116	0.083	0.141	-0.031	0.261	0.002	-0.043	-0.025	0.235	-0.125	0.201	0.238	0.035	0.301	0.018	0.231	0.139	0.043	0.651	0.245	—
	gl	57	64	64	64	63	63	64	22	64	64	55	64	64	64	41	64	59	63	64	64	64	64	64	64	62	64	64	64	64	64	64	63	63	64	64	63	63	64	63	—
	p-value	0.626	0.395	< .001	0.493	0.013	0.826	0.528	0.824	0.464	0.029	0.531	0.023	0.139	0.404	0.573	0.106	0.003	0.981	0.741	0.354	0.51	0.26	0.804	0.034	0.986	0.73	0.842	0.058	0.316	0.106	0.054	0.781	0.015	0.887	0.062	0.268	0.731	< .001	0.049	—
Phe	Pearson (r)	0.05	0.102	0.609	0.031	0.018	0.239	0.211	-0.051	-0.001	0.467	-0.111	0.393	-0.004	0.06	0.078	0.444	0.396	0.33	0.009	0.206	0.364	0.421	-0.045	0.465	0.03	-0.067	0.214	0.62	0.23	0.495	0.449	0.228	0.28	0.366	0.566	0.323	0.227	0.603	0.33	0.508	—
	gl	78	88	88	87	86	85	88	28	88	88	68	88	88	88	58	88	68	84	88	88	88	88	88	88	86	88	85	88	88	88	88	84	84	85	88	82	87	77	69	59	—
	p-value	0.661	0.341	< .001	0.771	0.868	0.026	0.046	0.787	0.995	< .001	0.358	< .001	0.967	0.574	0.554	< .001	< .001	0.002	0.932	0.052	< .001	< .001	0.674	< .001	0.783	0.528	0.047	< .001	0.029	< .001	< .001	0.035	0.009	< .001	< .001	0.003	0.032	< .001	0.005	< .001	—
Ant	Pearson (r)	-0.416	-0.335	0.538	-0.322	0.164	-0.227	-0.241	-0.964	-0.335	0.454	-0.312	0.259	0.057	-0.208	0.607	0.116	0.596	0.09	0.1	0.155	0.285	0.039	-0.232	0.199	-0.411	-0.044	-0.178	0.124	-0.136	0.184	0.192	-0.046	0.239	-0.078	0.235	0.333	-0.118	0.452	-0.059	0.575	0.733	—
	gl	11	14	14	14	14	14	14	1	14	14	12	14	14	14	9	14	14	14	14	14	14	14	14	14	13	14	14	14	14	14	14	14	14	14	14	14	14	14	14	13	14	—
	p-value	0.158	0.205	0.032	0.224	0.544	0.398	0.368	0.171	0.205	0.077	0.278	0.333	0.833	0.439	0.048	0.668	0.015	0.74	0.712	0.568	0.285	0.886	0.387	0.46	0.128	0.871	0.51	0.647	0.615	0.495	0.476	0.866	0.372	0.774	0.38	0.208	0.663	0.079	0.829	0.025	0.001	—
Flt	Pearson (r)	-0.016	0.236	0.567	0.046	0.106	0.473	0.294	0.033	0.104	0.514	-0.126	0.371	0.004	0.118	0.119	0.458	0.472	0.405	0.041	0.24	0.438	0.412	0.052	0.382	0.006	-0.036	0.208	0.533	0.237	0.556	0.479	0.365	0.324	0.445	0.581	0.308	0.222	0.52	0.415	0.457	0.824	0.55	—
	gl	80	91	91	90	89	88	91	29	91	91	72	91	91	91	58	91	72	87	91	91	91	91	91	91	89	91	88	91	91	91	91	87	87	88	91	85	90	81	73	62	87	14	—
	p-value	0.885	0.023	< .001	0.66	0.319	< .001	0.004	0.86	0.322	< .001	0.285	< .001	0.971	0.261	0.367	< .001	< .001	< .001	0.695	0.021	< .001	< .001	0.621	< .001	0.952	0.732	0.05	< .001	0.022	< .001	< .001	< .001	0.002	< .001	< .001	0.004	0.034	< .001	< .001	< .001	< .001	0.027	—
Pyr	Pearson (r)	0.053	0.116	0.578	0.161	0.211	0.206	0.256	0.019	0.034	0.473	-0.133	0.345	0.03	0.037	0.114	0.389	0.392	0.28	0.035	0.169	0.297	0.293	0.007	0.356	0.033	-0.1	0.085	0.474	0.121	0.412	0.331	0.203	0.271	0.282	0.467	0.221	0.191	0.487	0.227	0.511	0.872	0.693	0.879	—
	gl	83	95	95	94	93	92	95	30	95	95	74	95	95	95	60	95	76	91	95	95	95	95	95	95	93	95	92	95	95	95	95	91	91	92	95	89	94	83	75	64	87	14	91	—
	p-value	0.627	0.259	< .001	0.117	0.04	0.046	0.012	0.916	0.743	< .001	0.25	< .001	0.768	0.716	0.378	< .001	< .001	0.007	0.734	0.098	0.003	0.004	0.947	< .001	0.751	0.329	0.414	< .001	0.239	< .001	< .001	0.051	0.009	0.006	< .001	0.036	0.063	< .001	0.047	< .001	< .001	0.003	< .001	—
Ret	Pearson (r)	0.008	0.133	0.126	0.009	0.027	0.047	0.173	0.053	0.084	0.094	-0.158	0.098	-0.045	-0.029	-0.006	0.068	0.048	0.13	-0.046	-0.083	0.115	0.14	0.036	0.06	0.084	-0.138	0.085	0.152	-0.015	0.144	0.123	0.103	0.089	0.167	0.106	0.154	0.238	0.048	0	0.146	0.456	0.094	0.41	0.478	—
	gl	79	90	90	90	89	88	90	27	90	90	69	90	90	90	56	90	71	86	90	90	90	90	90	90	88	90	87	90	90	90	90	86	86	87	90	83	89	80	71	60	83	14	87	89	—
	p-value	0.946	0.207	0.231	0.934	0.798	0.663	0.099	0.785	0.429	0.371	0.188	0.353	0.673	0.784	0.967	0.519	0.686	0.227	0.665	0.431	0.276	0.182	0.734	0.57	0.429	0.189	0.431	0.149	0.885	0.17	0.241	0.34	0.409	0.119	0.313	0.16	0.023	0.665	0.998	0.258	< .001	0.728	< .001	< .001	—
BaA	Pearson (r)	0.022	0.261	0.455	0.042	-0.103	0.609	0.319	0.044	0.101	0.454	-0.102	0.386	-0.023	0.151	0.131	0.526	0.44	0.485	0.291	0.221	0.532	0.481	0.074	0.4	0.154	0.072	0.368	0.598	0.256	0.686	0.526	0.406	0.342	0.528	0.621	0.352	0.388	0.498	0.518	0.204	0.573	0.008	0.748	0.526	0.243	—
	gl	71	82	82	81	80	80	82	23	82	82	65	82	82	82	53	82	67	78	82	82	82	82	82	82	80	82	79	82	82	82	82	78	78	79	82	78	81	72	67	58	79	14	81	81	77	—
	p-value	0.853	0.017	< .001	0.705	0.356	< .001	0.003	0.834	0.363	< .001	0.412	< .001	0.833	0.17	0.339	< .001	< .001	< .001	0.007	0.043	< .001	< .001	0.504	< .001	0.168	0.517	< .001	< .001	0.019	< .001	< .001	< .001	0.002	< .001	< .001	0.001	< .001	< .001	< .001	0.119	< .001	0.978	< .001	< .001	0.031	—
Chr	Pearson (r)	0.09	0.168	0.555	0.04	-0.078	0.548	0.255	0.165	0.028	0.464	-0.1	0.421	0.023	0.056	0.196	0.518	0.425	0.436	0.049	0.261	0.459	0.485	0.047	0.488	0.117	0.05	0.377	0.592	0.226	0.625	0.447	0.394	0.398	0.506	0.58	0.413	0.328	0.585	0.567	0.252	0.602	0.126	0.774	0.598	0.298	0.871	—
	gl	85	97	97	96	95	94	97	30	97	97	74	97	97	97	60	97	76	93	97	97	97	97	97	97	95	97	94	97	97	97	97	93	93	94	97	90	96	84	75	64	88	14	91	95	90	82	—
	p-value	0.408	0.096	< .001	0.693	0.45	< .001	0.011	0.368	0.784	< .001	0.388	< .001	0.824	0.58	0.126	< .001	< .001	< .001	0.628	0.009	< .001	< .001	0.641	< .001	0.255	0.626	< .001	< .001	0.025	< .001	< .001	< .001	< .001	< .001	< .001	< .001	< .001	< .001	< .001	0.041	< .001	0.643	< .001	< .001	0.004	< .001	—
BbF	Pearson (r)	0.125	0.099	0.663	-0.009	-0.1	0.535	0.202	-0.038	-0.04	0.453	-0.024	0.556	0.013	0.05	0.235	0.523	0.37	0.371	0.038	0.275	0.393	0.516	0.033	0.586	0.101	0.126	0.4	0.639	0.248	0.591	0.385	0.309	0.363	0.485	0.598	0.355	0.239	0.659	0.644	0.329	0.641	0.144	0.755	0.616	0.244	0.743	0.895	—
	gl	85	97	97	96	95	94	97	30	97	97	74	97	97	97	60	97	76	93	97	97	97	97	97	97	95	97	94	97	97	97	97	93	93	94	97	90	96	84	75	64	88	14	91	95	90	82	97	—
	p-value	0.248	0.332	< .001	0.933	0.328	< .001	0.045	0.835	0.695	< .001	0.837	< .001	0.898	0.621	0.066	< .001	< .001	< .001	0.712	0.006	< .001	< .001	0.745	< .001	0.323	0.213	< .001	< .001	0.013	< .001	< .001	0.002	< .001	< .001	< .001	< .001	0.018	< .001	< .001	0.007	< .001	0.596	< .001	< .001	0.019	< .001	< .001	—
BkF	Pearson (r)	0.054	0.156	0.6	-0.013	-0.061	0.462	0.226	0.005	0.052	0.474	-0.087	0.467	-0.037	0.1	0.189	0.5	0.333	0.434	0.038	0.31	0.381	0.443	0.056	0.515	0.075	0.039	0.403	0.582	0.253	0.629	0.347	0.347	0.343	0.566	0.57	0.41	0.257	0.594	0.531	0.314	0.586	0.217	0.707	0.575	0.264	0.723	0.836	0.897
	gl	84	96	96	95	94	93	96	30	96	96	74	96	96	96	60	96	76	92	96	96	96	96	96	96	94	96	93	96	96	96	96	92	92	93	96	89	95	84	75	64	87	14	91	95	90	81	96	96
	p-value	0.622	0.124	< .001	0.899	0.556	< .001	0.025	0.98	0.609	< .001	0.457	< .001	0.718	0.327	0.14	< .001	0.003	< .001	0.712	0.002	< .001	< .001	0.586	< .001	0.466	0.7	< .001	< .001	0.012	< .001	< .001	< .001	< .001	< .001	< .001	< .001	0.011	< .001	< .001	0.01	< .001	0.42	< .001	< .001	0.011	< .001	< .001	< .001
BeP	Pearson (r)	0.089	0.038	0.668	-0.022	-0.048	0.398	0.132	-0.047	-0.049	0.464	-0.09	0.527	0.006	0.018	0.194	0.473	0.404	0.354	0.048	0.232	0.407	0.471	-0.026	0.524	0.069	0.02	0.28	0.605	0.21	0.563	0.38	0.246	0.335	0.436	0.577	0.32	0.197	0.692	0.517	0.475	0.719	0.326	0.778	0.679	0.331	0.72	0.846	0.907
	gl	85	97	97	96	95	94	97	30	97	97	74	97	97	97	60	97	76	93	97	97	97	97	97	97	95	97	94	97	97	97	97	93	93	94	97	90	96	84	75	64	88	14	91	95	90	82	97	97
	p-value	0.41	0.71	< .001	0.831	0.641	< .001	0.192	0.798	0.628	< .001	0.441	< .001	0.955	0.859	0.13	< .001	< .001	< .001	0.64	0.021	< .001	< .001	0.796	< .001	0.503	0.842	0.006	< .001	0.037	< .001	< .001	0.016	< .001	< .001	< .001	0.002	0.052	< .001	< .001	< .001	< .001	0.218	< .001	< .001	0.001	< .001	< .001	< .001
BaP	Pearson (r)	-0.046	-0.015	0.634	-0.056	-0.078	0.458	0.047	-0.205	-0.125	0.394	-0.038	0.517	-0.056	-0.05	0.236	0.475	0.385	0.304	0.171	0.275	0.375	0.445	-0.127	0.533	0.025	0.1	0.326	0.587	0.113	0.579	0.305	0.223	0.279	0.371	0.56	0.393	0.203	0.707	0.614	0.416	0.614	0.295	0.713	0.54	0.206	0.772	0.844	0.909
	gl	68	79	79	79	78	78	79	27	79	79	65	79	79	79	48	79	68	76	79	79	79	79	79	79	77	79	77	79	79	79	79	76	76	77	79	74	78	74	70	61	73	14	77	79	75	72	79	79
	p-value	0.707	0.894	< .001	0.621	0.493	< .001	0.679	0.285	0.267	< .001	0.762	< .001	0.621	0.655	0.098	< .001	< .001	0.007	0.127	0.013	< .001	< .001	0.259	< .001	0.829	0.372	0.003	< .001	0.317	< .001	0.006	0.05	0.013	< .001	< .001	< .001	0.071	< .001	< .001	< .001	< .001	0.267	< .001	< .001	0.072	< .001	< .001	< .001
Per	Pearson (r)	0.03	0.242	0.199	-0.219	-0.124	0.609	0.163	-0.107	0.053	0.344	-0.153	0.249	0.046	0.063	-0.094	0.48	0.628	0.247	0.069	0.232	0.678	0.292	-0.054	0.136	-0.098	0.241	0.261	0.377	0.141	0.445	0.441	0.423	0.437	0.273	0.611	0.169	0.071	0.232	0.389	0.115	0.38	0.28	0.629	0.303	-0.009	0.706	0.634	0.541
	gl	32	37	37	37	37	37	37	10	37	37	33	37	37	37	24	37	35	37	37	37	37	37	37	37	35	37	37	37	37	37	37	37	37	37	37	37	36	37	37	35	35	14	37	37	36	37	37	37
	p-value	0.866	0.137	0.225	0.18	0.453	< .001	0.32	0.741	0.748	0.032	0.381	0.126	0.78	0.705	0.649	0.002	< .001	0.13	0.677	0.156	< .001	0.071	0.745	0.409	0.565	0.139	0.108	0.018	0.393	0.004	0.005	0.007	0.005	0.093	< .001	0.305	0.673	0.154	0.014	0.499	0.02	0.294	< .001	0.061	0.956	< .001	< .001	< .001
InP	Pearson (r)	0.157	0.089	0.72	0.032	-0.047	0.541	0.219	-0.182	-0.03	0.442	0.037	0.622	0.014	0.109	0.357	0.617	0.427	0.507	0.174	0.19	0.473	0.551	0.059	0.661	0.17	0.147	0.425	0.73	0.298	0.674	0.473	0.375	0.395	0.534	0.679	0.431	0.258	0.636	0.613	0.311	0.601	0.121	0.709	0.59	0.23	0.744	0.83	0.914
	gl	85	97	97	96	95	94	97	30	97	97	74	97	97	97	60	97	76	93	97	97	97	97	97	97	95	97	94	97	97	97	97	93	93	94	97	90	96	84	75	64	88	14	91	95	90	82	97	97
	p-value	0.147	0.38	< .001	0.754	0.645	< .001	0.03	0.319	0.769	< .001	0.749	< .001	0.891	0.281	0.004	< .001	< .001	< .001	0.085	0.06	< .001	< .001	0.562	< .001	0.096	0.146	< .001	< .001	0.003	< .001	< .001	< .001	< .001	< .001	< .001	< .001	0.01	< .001	< .001	0.011	< .001	0.655	< .001	< .001	0.028	< .001	< .001	< .001
DBA	Pearson (r)	-0.005	-0.128	0.442	-0.109	-0.082	0.371	-0.052	0.329	-0.185	0.189	0.05	0.497	0.208	0.011	0.012	0.371	0.439	0.289	0.203	0.138	0.469	0.235	-0.201	0.421	0.145	0.134	0.21	0.424	0.166	0.53	0.375	0.106	0.404	0.155	0.487	0.127	0.048	0.183	0.362	0.002	0.077	0.345	0.189	0.101	0.037	0.317	0.367	0.363
	gl	42	47	47	47	47	47	47	10	47	47	38	47	47	47	30	47	41	45	47	47	47	47	47	47	45	47	45	47	47	47	47	45	45	45	47	46	46	43	41	38	45	14	47	47	46	47	47	47
	p-value	0.972	0.38	0.001	0.454	0.574	0.009	0.722	0.297	0.202	0.192	0.758	< .001	0.152	0.941	0.947	0.009	0.003	0.049	0.162	0.344	< .001	0.104	0.167	0.003	0.331	0.359	0.157	0.002	0.256	< .001	0.008	0.476	0.005	0.299	< .001	0.389	0.747	0.228	0.017	0.988	0.605	0.19	0.193	0.491	0.803	0.026	0.009	0.01
BPe	Pearson (r)	0.118	0.059	0.713	-0.012	-0.072	0.534	0.204	-0.079	-0.047	0.441	0	0.669	0.007	0.12	0.23	0.608	0.47	0.521	0.143	0.189	0.569	0.532	0.017	0.643	0.17	0.124	0.401	0.715	0.321	0.731	0.507	0.368	0.396	0.522	0.707	0.385	0.219	0.571	0.568	0.279	0.563	0.277	0.687	0.547	0.251	0.735	0.791	0.831
	gl	84	96	96	95	94	93	96	29	96	96	73	96	96	96	60	96	76	92	96	96	96	96	96	96	94	96	93	96	96	96	96	92	92	93	96	89	95	83	74	64	87	14	90	94	89	82	96	96
	p-value	0.28	0.566	< .001	0.909	0.486	< .001	0.044	0.674	0.642	< .001	0.999	< .001	0.945	0.239	0.072	< .001	< .001	< .001	0.16	0.062	< .001	< .001	0.868	< .001	0.097	0.223	< .001	< .001	0.001	< .001	< .001	< .001	< .001	< .001	< .001	< .001	0.031	< .001	< .001	0.023	< .001	0.3	< .001	< .001	0.016	< .001	< .001	< .001
Cor	Pearson (r)	0.09	0.089	0.621	0.032	0.015	0.512	0.182	0.031	-0.011	0.367	-0.074	0.487	-0.025	0.052	0.169	0.526	0.432	0.476	0.155	0.079	0.52	0.456	0.035	0.509	0.114	0.047	0.301	0.634	0.256	0.68	0.449	0.376	0.338	0.504	0.64	0.273	0.22	0.476	0.495	0.321	0.553	0.099	0.743	0.589	0.307	0.751	0.753	0.773
	gl	83	94	94	94	93	93	94	28	94	94	71	94	94	94	59	94	76	90	94	94	94	94	94	94	92	94	91	94	94	94	94	90	90	91	94	87	93	82	74	64	85	14	88	92	88	81	94	94
	p-value	0.415	0.388	< .001	0.754	0.882	< .001	0.076	0.87	0.912	< .001	0.532	< .001	0.806	0.613	0.194	< .001	< .001	< .001	0.13	0.444	< .001	< .001	0.734	< .001	0.275	0.647	0.003	< .001	0.012	< .001	< .001	< .001	< .001	< .001	< .001	0.01	0.032	< .001	< .001	0.009	< .001	0.716	< .001	< .001	0.003	< .001	< .001	< .001
LMW	Pearson (r)	0.05	0.167	0.592	0.069	0.016	0.422	0.289	0.111	0.034	0.496	-0.158	0.418	0.022	0.049	0.121	0.502	0.465	0.428	0.045	0.224	0.457	0.453	0.06	0.439	0.107	-0.021	0.28	0.59	0.194	0.588	0.434	0.355	0.372	0.468	0.58	0.355	0.32	0.573	0.426	0.426	0.856	0.515	0.949	0.87	0.555	0.827	0.877	0.82
	gl	85	97	97	96	95	94	97	30	97	97	74	97	97	97	60	97	76	93	97	97	97	97	97	97	95	97	94	97	97	97	97	93	93	94	97	90	96	84	75	64	88	14	91	95	90	82	97	97
	p-value	0.647	0.098	< .001	0.499	0.873	< .001	0.004	0.544	0.736	< .001	0.174	< .001	0.831	0.632	0.347	< .001	< .001	< .001	0.657	0.025	< .001	< .001	0.558	< .001	0.299	0.84	0.006	< .001	0.054	< .001	< .001	< .001	< .001	< .001	< .001	< .001	0.001	< .001	< .001	< .001	< .001	0.041	< .001	< .001	< .001	< .001	< .001	< .001
HMW	Pearson (r)	0.115	0.092	0.718	-0.005	-0.075	0.543	0.209	-0.057	-0.029	0.48	-0.03	0.6	0.005	0.083	0.252	0.588	0.448	0.463	0.097	0.237	0.498	0.54	0.021	0.628	0.127	0.106	0.401	0.702	0.281	0.69	0.46	0.356	0.395	0.531	0.679	0.396	0.244	0.674	0.631	0.374	0.661	0.243	0.782	0.637	0.275	0.796	0.892	0.96
	gl	85	97	97	96	95	94	97	30	97	97	74	97	97	97	60	97	76	93	97	97	97	97	97	97	95	97	94	97	97	97	97	93	93	94	97	90	96	84	75	64	88	14	91	95	90	82	97	97
	p-value	0.287	0.363	< .001	0.958	0.466	< .001	0.038	0.755	0.778	< .001	0.796	< .001	0.965	0.412	0.048	< .001	< .001	< .001	0.342	0.018	< .001	< .001	0.838	< .001	0.215	0.296	< .001	< .001	0.005	< .001	< .001	< .001	< .001	< .001	< .001	< .001	0.015	< .001	< .001	0.002	< .001	0.365	< .001	< .001	0.008	< .001	< .001	< .001
BaP_TEQ	Pearson (r)	0.076	0.046	0.642	-0.03	-0.104	0.529	0.163	0.143	-0.057	0.377	-0.047	0.546	-0.005	0.079	0.125	0.542	0.434	0.425	0.073	0.159	0.541	0.447	-0.054	0.585	0.127	0.077	0.343	0.64	0.247	0.704	0.462	0.291	0.369	0.452	0.642	0.346	0.184	0.559	0.589	0.271	0.504	0.313	0.627	0.482	0.259	0.694	0.772	0.79
	gl	85	97	97	96	95	94	97	30	97	97	74	97	97	97	60	97	76	93	97	97	97	97	97	97	95	97	94	97	97	97	97	93	93	94	97	90	96	84	75	64	88	14	91	95	90	82	97	97
	p-value	0.483	0.655	< .001	0.773	0.312	< .001	0.107	0.433	0.578	< .001	0.685	< .001	0.963	0.437	0.333	< .001	< .001	< .001	0.476	0.116	< .001	< .001	0.596	< .001	0.216	0.45	< .001	< .001	0.014	< .001	< .001	0.004	< .001	< .001	< .001	< .001	0.07	< .001	< .001	0.028	< .001	0.238	< .001	< .001	0.013	< .001	< .001	< .001
BaP_MEQ	Pearson (r)	0.124	0.089	0.722	0.009	-0.085	0.559	0.208	-0.086	-0.034	0.483	0.002	0.623	0.013	0.088	0.279	0.604	0.447	0.446	0.089	0.252	0.498	0.556	0.016	0.651	0.155	0.147	0.431	0.709	0.259	0.693	0.466	0.36	0.403	0.512	0.682	0.412	0.262	0.699	0.661	0.369	0.641	0.226	0.76	0.614	0.252	0.795	0.891	0.962
	gl	85	97	97	96	95	94	97	30	97	97	74	97	97	97	60	97	76	93	97	97	97	97	97	97	95	97	94	97	97	97	97	93	93	94	97	90	96	84	75	64	88	14	91	95	90	82	97	97
	p-value	0.253	0.381	< .001	0.933	0.406	< .001	0.039	0.641	0.741	< .001	0.989	< .001	0.897	0.388	0.028	< .001	< .001	< .001	0.38	0.012	< .001	< .001	0.879	< .001	0.13	0.147	< .001	< .001	0.01	< .001	< .001	< .001	< .001	< .001	< .001	< .001	0.009	< .001	< .001	0.002	< .001	0.4	< .001	< .001	0.015	< .001	< .001	< .001
TU	Pearson (r)	0.076	0.117	0.695	0.083	0.133	0.275	0.203	-0.185	0.105	0.44	-0.01	0.588	-0.004	0.135	0.03	0.335	0.239	0.238	0.077	0.144	0.327	0.399	-0.003	0.609	0.11	0.076	0.251	0.465	0.253	0.452	0.308	0.15	0.226	0.32	0.509	0.057	0.078	0.495	0.437	0.342	0.412	0.363	0.382	0.373	0.147	0.282	0.301	0.447
	gl	85	97	97	96	95	94	97	30	97	97	74	97	97	97	60	97	76	93	97	97	97	97	97	97	95	97	94	97	97	97	97	93	93	94	97	90	96	84	75	64	88	14	91	95	90	82	97	97
	p-value	0.485	0.25	< .001	0.416	0.193	0.007	0.044	0.311	0.302	< .001	0.931	< .001	0.972	0.183	0.819	< .001	0.035	0.02	0.449	0.156	< .001	< .001	0.975	< .001	0.286	0.452	0.014	< .001	0.012	< .001	0.002	0.147	0.027	0.001	< .001	0.592	0.447	< .001	< .001	0.005	< .001	0.167	< .001	< .001	0.162	0.009	0.002	< .001
OC	Pearson (r)	0.185	0.141	0.871	0.092	-0.052	0.591	0.302	-0.01	0.046	0.667	0.043	0.769	0.114	0.228	0.249	0.71	0.574	0.529	0.168	0.319	0.594	0.668	0.08	0.829	0.256	0.234	0.51	0.811	0.348	0.805	0.584	0.433	0.515	0.542	0.804	0.364	0.302	0.777	0.737	0.461	0.669	0.436	0.697	0.586	0.142	0.724	0.729	0.771
	gl	85	97	97	96	95	94	97	30	97	97	74	97	97	97	60	97	76	93	97	97	97	97	97	97	95	97	94	97	97	97	97	93	93	94	97	90	96	84	75	64	88	14	91	95	90	82	97	97
	p-value	0.086	0.164	< .001	0.366	0.615	< .001	0.002	0.955	0.649	< .001	0.715	< .001	0.262	0.023	0.051	< .001	< .001	< .001	0.096	0.001	< .001	< .001	0.43	< .001	0.012	0.02	< .001	< .001	< .001	< .001	< .001	< .001	< .001	< .001	< .001	< .001	0.002	< .001	< .001	< .001	< .001	0.091	< .001	< .001	0.176	< .001	< .001	< .001
EC	Pearson (r)	0.145	0.129	0.744	0.033	-0.085	0.515	0.3	-0.189	0.021	0.56	0.067	0.656	0.095	0.198	0.277	0.766	0.57	0.589	0.162	0.26	0.713	0.596	0.074	0.708	0.258	0.241	0.439	0.797	0.417	0.832	0.585	0.455	0.489	0.559	0.845	0.393	0.301	0.634	0.465	0.378	0.662	0.564	0.662	0.604	0.171	0.671	0.681	0.727
	gl	85	97	97	96	95	94	97	30	97	97	74	97	97	97	60	97	76	93	97	97	97	97	97	97	95	97	94	97	97	97	97	93	93	94	97	90	96	84	75	64	88	14	91	95	90	82	97	97
	p-value	0.181	0.203	< .001	0.747	0.406	< .001	0.003	0.3	0.837	< .001	0.563	< .001	0.348	0.05	0.029	< .001	< .001	< .001	0.108	0.009	< .001	< .001	0.466	< .001	0.011	0.016	< .001	< .001	< .001	< .001	< .001	< .001	< .001	< .001	< .001	< .001	0.003	< .001	< .001	0.002	< .001	0.023	< .001	< .001	0.103	< .001	< .001	< .001
SOC	Pearson (r)	0.192	0.171	0.76	0.073	-0.077	0.575	0.31	0.185	0.073	0.618	-0.021	0.686	0.099	0.253	0.086	0.522	0.424	0.329	0.143	0.293	0.509	0.58	0.093	0.74	0.147	0.223	0.464	0.631	0.258	0.622	0.445	0.336	0.407	0.427	0.659	0.21	0.181	0.651	0.753	0.326	0.524	0.155	0.56	0.408	0.122	0.609	0.605	0.633
	gl	81	92	92	91	90	89	92	30	92	92	70	92	92	92	56	92	71	89	92	92	92	92	92	92	90	92	90	92	92	92	92	89	89	90	92	85	91	79	70	60	83	13	86	90	85	77	92	92
	p-value	0.082	0.1	< .001	0.486	0.464	< .001	0.002	0.311	0.483	< .001	0.863	< .001	0.343	0.014	0.52	< .001	< .001	0.001	0.168	0.004	< .001	< .001	0.37	< .001	0.161	0.031	< .001	< .001	0.012	< .001	< .001	0.001	< .001	< .001	< .001	0.051	0.083	< .001	< .001	0.01	< .001	0.581	< .001	< .001	0.258	< .001	< .001	< .001
OC1	Pearson (r)	0.133	0.16	0.799	0.051	-0.117	0.596	0.315	0.164	0.07	0.612	-0.016	0.71	0.129	0.239	0.164	0.708	0.575	0.522	0.192	0.292	0.65	0.607	0.095	0.739	0.205	0.278	0.485	0.765	0.344	0.773	0.588	0.423	0.507	0.516	0.801	0.309	0.205	0.664	0.663	0.381	0.642	0.356	0.683	0.573	0.159	0.708	0.712	0.751
	gl	85	97	97	96	95	94	97	30	97	97	74	97	97	97	60	97	76	93	97	97	97	97	97	97	95	97	94	97	97	97	97	93	93	94	97	90	96	84	75	64	88	14	91	95	90	82	97	97
	p-value	0.221	0.113	< .001	0.619	0.252	< .001	0.002	0.369	0.489	< .001	0.888	< .001	0.201	0.017	0.202	< .001	< .001	< .001	0.057	0.003	< .001	< .001	0.349	< .001	0.044	0.005	< .001	< .001	< .001	< .001	< .001	< .001	< .001	< .001	< .001	0.003	0.043	< .001	< .001	0.002	< .001	0.176	< .001	< .001	0.129	< .001	< .001	< .001
OC2	Pearson (r)	0.139	0.089	0.866	0.057	-0.06	0.553	0.235	-0.037	0.003	0.635	-0.001	0.741	0.089	0.16	0.27	0.683	0.572	0.513	0.172	0.308	0.589	0.622	0.04	0.785	0.209	0.199	0.466	0.775	0.325	0.778	0.558	0.391	0.487	0.511	0.784	0.331	0.259	0.765	0.697	0.472	0.671	0.468	0.696	0.583	0.155	0.724	0.745	0.792
	gl	85	97	97	96	95	94	97	30	97	97	74	97	97	97	60	97	76	93	97	97	97	97	97	97	95	97	94	97	97	97	97	93	93	94	97	90	96	84	75	64	88	14	91	95	90	82	97	97
	p-value	0.199	0.381	< .001	0.58	0.558	< .001	0.019	0.841	0.977	< .001	0.993	< .001	0.379	0.114	0.034	< .001	< .001	< .001	0.088	0.002	< .001	< .001	0.697	< .001	0.04	0.048	< .001	< .001	0.001	< .001	< .001	< .001	< .001	< .001	< .001	0.001	0.01	< .001	< .001	< .001	< .001	0.067	< .001	< .001	0.139	< .001	< .001	< .001
OC3	Pearson (r)	0.219	-0.014	0.906	0.111	0.006	0.513	0.189	-0.093	-0.104	0.612	0.083	0.791	0.146	0.128	0.27	0.672	0.582	0.484	0.134	0.304	0.516	0.617	0.027	0.832	0.234	0.209	0.457	0.756	0.296	0.723	0.531	0.355	0.518	0.462	0.741	0.313	0.252	0.788	0.69	0.496	0.66	0.534	0.644	0.581	0.148	0.628	0.687	0.757
	gl	85	97	97	96	95	94	97	30	97	97	74	97	97	97	60	97	76	93	97	97	97	97	97	97	95	97	94	97	97	97	97	93	93	94	97	90	96	84	75	64	88	14	91	95	90	82	97	97
	p-value	0.041	0.891	< .001	0.277	0.953	< .001	0.061	0.614	0.306	< .001	0.476	< .001	0.148	0.208	0.034	< .001	< .001	< .001	0.188	0.002	< .001	< .001	0.793	< .001	0.021	0.038	< .001	< .001	0.003	< .001	< .001	< .001	< .001	< .001	< .001	0.002	0.012	< .001	< .001	< .001	< .001	0.033	< .001	< .001	0.158	< .001	< .001	< .001
OC4	Pearson (r)	0.268	0.178	0.867	0.252	0.079	0.41	0.374	-0.057	0.132	0.788	0.181	0.798	0.197	0.307	0.31	0.666	0.512	0.514	0.171	0.39	0.484	0.668	0.221	0.831	0.373	0.239	0.49	0.741	0.43	0.683	0.529	0.409	0.528	0.555	0.731	0.319	0.356	0.756	0.532	0.47	0.626	0.593	0.576	0.605	0.134	0.481	0.545	0.616
	gl	85	97	97	96	95	94	97	30	97	97	74	97	97	97	60	97	76	93	97	97	97	97	97	97	95	97	94	97	97	97	97	93	93	94	97	90	96	84	75	64	88	14	91	95	90	82	97	97
	p-value	0.012	0.079	< .001	0.012	0.444	< .001	< .001	0.758	0.193	< .001	0.117	< .001	0.051	0.002	0.014	< .001	< .001	< .001	0.091	< .001	< .001	< .001	0.028	< .001	< .001	0.017	< .001	< .001	< .001	< .001	< .001	< .001	< .001	< .001	< .001	0.002	< .001	< .001	< .001	< .001	< .001	0.016	< .001	< .001	0.202	< .001	< .001	< .001
PC	Pearson (r)	0.133	0.207	0.68	-0.025	-0.15	0.668	0.321	-0.027	0.06	0.511	-0.031	0.601	0.022	0.235	0.135	0.625	0.463	0.451	0.13	0.255	0.554	0.612	0.011	0.71	0.192	0.242	0.51	0.757	0.264	0.793	0.531	0.454	0.407	0.508	0.734	0.371	0.3	0.657	0.751	0.342	0.562	0.224	0.65	0.434	0.06	0.782	0.702	0.698
	gl	81	91	91	91	91	89	91	27	91	91	69	91	91	91	57	91	74	88	91	91	91	91	91	91	89	91	89	91	91	91	91	88	88	89	91	85	90	81	73	62	82	13	85	89	85	77	91	91
	p-value	0.231	0.046	< .001	0.812	0.152	< .001	0.002	0.891	0.565	< .001	0.796	< .001	0.837	0.023	0.307	< .001	< .001	< .001	0.214	0.014	< .001	< .001	0.919	< .001	0.068	0.019	< .001	< .001	0.011	< .001	< .001	< .001	< .001	< .001	< .001	< .001	0.004	< .001	< .001	0.006	< .001	0.422	< .001	< .001	0.58	< .001	< .001	< .001
EC1	Pearson (r)	0.226	0.239	0.699	-0.041	-0.276	0.754	0.387	-0.019	0.078	0.539	0.079	0.719	0.089	0.334	0.252	0.694	0.426	0.43	0.133	0.369	0.582	0.712	0.114	0.826	0.29	0.414	0.64	0.8	0.354	0.795	0.507	0.448	0.433	0.507	0.783	0.335	0.271	0.673	0.847	0.259	0.503	0.115	0.579	0.383	0.041	0.678	0.655	0.723
	gl	84	96	96	95	94	93	96	30	96	96	74	96	96	96	59	96	76	92	96	96	96	96	96	96	94	96	93	96	96	96	96	92	92	93	96	90	95	84	75	64	87	14	90	94	89	81	96	96
	p-value	0.036	0.018	< .001	0.687	0.006	< .001	< .001	0.919	0.443	< .001	0.495	< .001	0.381	< .001	0.05	< .001	< .001	< .001	0.191	< .001	< .001	< .001	0.262	< .001	0.004	< .001	< .001	< .001	< .001	< .001	< .001	< .001	< .001	< .001	< .001	0.001	0.007	< .001	< .001	0.036	< .001	0.673	< .001	< .001	0.699	< .001	< .001	< .001
EC2	Pearson (r)	0.137	0.141	0.737	0.024	-0.089	0.558	0.292	-0.172	0.033	0.529	0.064	0.655	0.077	0.2	0.219	0.78	0.584	0.603	0.166	0.181	0.726	0.625	0.036	0.726	0.257	0.224	0.453	0.843	0.363	0.892	0.622	0.503	0.5	0.561	0.841	0.434	0.348	0.631	0.549	0.383	0.651	0.46	0.676	0.577	0.15	0.745	0.702	0.716
	gl	84	96	96	95	94	93	96	30	96	96	74	96	96	96	59	96	76	92	96	96	96	96	96	96	94	96	93	96	96	96	96	92	92	93	96	90	95	84	75	64	87	14	90	94	89	81	96	96
	p-value	0.207	0.166	< .001	0.819	0.391	< .001	0.004	0.347	0.744	< .001	0.583	< .001	0.453	0.048	0.09	< .001	< .001	< .001	0.101	0.075	< .001	< .001	0.727	< .001	0.011	0.026	< .001	< .001	< .001	< .001	< .001	< .001	< .001	< .001	< .001	< .001	< .001	< .001	< .001	0.002	< .001	0.073	< .001	< .001	0.156	< .001	< .001	< .001
EC3	Pearson (r)	-0.059	-0.003	0.545	0.108	0.213	0.08	0.058	-0.187	-0.009	0.424	-0.112	0.27	-0.033	-0.07	0.169	0.408	0.441	0.467	0.104	0.041	0.454	0.196	-0.075	0.27	-0.004	-0.236	-0.019	0.429	0.226	0.505	0.422	0.213	0.292	0.381	0.522	0.335	0.205	0.44	-0.002	0.395	0.631	0.592	0.623	0.624	0.249	0.552	0.56	0.494
	gl	85	97	97	96	95	94	97	30	97	97	74	97	97	97	60	97	76	93	97	97	97	97	97	97	95	97	94	97	97	97	97	93	93	94	97	90	96	84	75	64	88	14	91	95	90	82	97	97
	p-value	0.59	0.979	< .001	0.289	0.037	0.437	0.567	0.305	0.931	< .001	0.334	0.007	0.747	0.489	0.189	< .001	< .001	< .001	0.306	0.69	< .001	0.052	0.461	0.007	0.967	0.019	0.856	< .001	0.025	< .001	< .001	0.038	0.004	< .001	< .001	0.001	0.043	< .001	0.99	0.001	< .001	0.016	< .001	< .001	0.017	< .001	< .001	< .001
EC4	Pearson (r)	-0.247	-0.076	0.189	0.039	0.337	-0.288	-0.15	0.088	-0.04	0.188	-0.336	-0.193	-0.174	-0.277	-0.095	-0.142	0.147	0.055	-0.031	-0.052	-0.039	-0.279	-0.185	-0.222	-0.33	-0.595	-0.483	-0.136	-0.025	-0.041	0.05	-0.155	-0.067	0.055	-0.003	0.087	-0.083	0.242	-0.257	0.408	0.378	0.45	0.358	0.375	0.165	0.181	0.238	0.133
	gl	85	97	97	96	95	94	97	30	97	97	74	97	97	97	60	97	76	93	97	97	97	97	97	97	95	97	94	97	97	97	97	93	93	94	97	90	96	84	75	64	88	14	91	95	90	82	97	97
	p-value	0.021	0.453	0.061	0.705	< .001	0.004	0.138	0.634	0.691	0.063	0.003	0.056	0.085	0.005	0.464	0.161	0.2	0.593	0.763	0.613	0.699	0.005	0.066	0.028	< .001	< .001	< .001	0.18	0.805	0.684	0.625	0.133	0.521	0.596	0.98	0.412	0.416	0.025	0.024	< .001	< .001	0.08	< .001	< .001	0.116	0.099	0.018	0.19
PM2.5	Pearson (r)	0.18	0.47	0.767	0.102	-0.011	0.652	0.579	-0.014	0.355	0.771	0.084	0.673	0.19	0.461	0.216	0.698	0.622	0.587	0.225	0.269	0.617	0.65	0.234	0.741	0.247	0.252	0.451	0.746	0.46	0.777	0.599	0.533	0.548	0.631	0.816	0.361	0.289	0.601	0.623	0.324	0.617	0.403	0.718	0.59	0.165	0.697	0.679	0.698
	gl	85	97	97	96	95	94	97	30	97	97	74	97	97	97	60	97	76	93	97	97	97	97	97	97	95	97	94	97	97	97	97	93	93	94	97	90	96	84	75	64	88	14	91	95	90	82	97	97
	p-value	0.094	< .001	< .001	0.318	0.913	< .001	< .001	0.939	< .001	< .001	0.468	< .001	0.06	< .001	0.092	< .001	< .001	< .001	0.025	0.007	< .001	< .001	0.02	< .001	0.015	0.012	< .001	< .001	< .001	< .001	< .001	< .001	< .001	< .001	< .001	< .001	0.004	< .001	< .001	0.008	< .001	0.121	< .001	< .001	0.116	< .001	< .001	< .001
OC/EC	Pearson (r)	-0.012	-0.028	-0.124	0.052	0.152	-0.141	-0.176	0.377	0.055	-0.036	-0.144	-0.12	-0.065	-0.074	-0.216	-0.418	-0.223	-0.348	0.018	-0.093	-0.412	-0.245	-0.164	-0.194	-0.168	-0.162	-0.258	-0.338	-0.313	-0.354	-0.294	-0.22	-0.217	-0.296	-0.398	-0.272	-0.21	-0.155	0.011	-0.064	-0.281	-0.377	-0.228	-0.227	-0.168	-0.221	-0.275	-0.244
	gl	85	97	97	96	95	94	97	30	97	97	74	97	97	97	60	97	76	93	97	97	97	97	97	97	95	97	94	97	97	97	97	93	93	94	97	90	96	84	75	64	88	14	91	95	90	82	97	97
	p-value	0.911	0.787	0.222	0.609	0.138	0.169	0.082	0.034	0.587	0.724	0.213	0.238	0.521	0.469	0.091	< .001	0.05	< .001	0.861	0.361	< .001	0.014	0.105	0.054	0.099	0.109	0.011	< .001	0.002	< .001	0.003	0.032	0.035	0.003	< .001	0.009	0.038	0.154	0.923	0.611	0.007	0.15	0.028	0.025	0.109	0.043	0.006	0.015
EC/Cu	Pearson (r)	0.086	0.072	0.389	0.124	0.237	0.081	0.126	-0.271	0.05	0.167	0.009	0.193	-0.089	0.006	0.021	0.267	0.155	0.191	0.037	-0.426	0.261	0.09	-0.101	0.253	-0.126	-0.238	-0.117	0.294	0.141	0.297	0.159	0.06	0.097	0.232	0.343	0.178	-0.071	0.206	0.023	0.418	0.384	0.355	0.346	0.443	0.23	0.193	0.241	0.313
	gl	85	97	97	96	95	94	97	30	97	97	74	97	97	97	60	97	76	93	97	97	97	97	97	97	95	97	94	97	97	97	97	93	93	94	97	90	96	84	75	64	88	14	91	95	90	82	97	97
	p-value	0.428	0.478	< .001	0.224	0.02	0.435	0.212	0.134	0.621	0.099	0.939	0.056	0.381	0.954	0.874	0.008	0.174	0.063	0.714	< .001	0.009	0.375	0.321	0.012	0.217	0.018	0.257	0.003	0.164	0.003	0.117	0.565	0.348	0.023	< .001	0.089	0.489	0.057	0.845	< .001	< .001	0.177	< .001	< .001	0.027	0.079	0.016	0.002
PC/CTot	Pearson (r)	0.063	0.405	0.508	-0.091	-0.127	0.542	0.444	-0.186	0.266	0.422	-0.099	0.374	-0.097	0.293	0.084	0.381	0.224	0.291	0.162	0.059	0.345	0.482	-0.015	0.546	0.025	0.125	0.335	0.56	0.215	0.585	0.374	0.315	0.182	0.42	0.545	0.355	0.177	0.492	0.619	0.248	0.394	0.253	0.494	0.309	0.021	0.616	0.515	0.527
	gl	81	91	91	91	91	89	91	27	91	91	69	91	91	91	57	91	74	88	91	91	91	91	91	91	89	91	89	91	91	91	91	88	88	89	91	85	90	81	73	62	82	13	85	89	85	77	91	91
	p-value	0.569	< .001	< .001	0.384	0.224	< .001	< .001	0.335	0.01	< .001	0.412	< .001	0.356	0.004	0.528	< .001	0.052	0.005	0.121	0.575	< .001	< .001	0.89	< .001	0.812	0.233	0.001	< .001	0.038	< .001	< .001	0.002	0.086	< .001	< .001	< .001	0.091	< .001	< .001	0.049	< .001	0.364	< .001	0.003	0.85	< .001	< .001	< .001
Fe/Ca2+	Pearson (r)	-0.051	0.112	0.171	-0.354	-0.273	0.364	0.14	-0.041	0.037	0.166	0.132	0.315	0.184	0.176	-0.003	0.501	0.508	0.477	0.122	0.145	0.535	0.407	0.098	0.264	0.175	0.369	0.32	0.396	0.271	0.509	0.377	0.334	0.33	0.315	0.457	0.302	0.081	0.09	0.182	0.039	0.203	0.234	0.281	0.108	0.056	0.364	0.314	0.312
	gl	66	76	76	76	76	75	76	20	76	76	62	76	76	76	51	76	76	72	76	76	76	76	76	76	74	76	73	76	76	76	76	72	72	73	76	75	75	71	67	59	68	14	72	76	71	67	76	76
	p-value	0.677	0.328	0.134	0.001	0.015	0.001	0.222	0.855	0.751	0.145	0.297	0.005	0.107	0.124	0.983	< .001	< .001	< .001	0.287	0.206	< .001	< .001	0.392	0.02	0.13	< .001	0.005	< .001	0.016	< .001	< .001	0.004	0.004	0.006	< .001	0.008	0.484	0.449	0.135	0.764	0.092	0.382	0.015	0.348	0.64	0.002	0.005	0.005
Cu/Sb	Pearson (r)	-0.103	-0.279	-0.289	-0.079	0.123	-0.215	-0.263	-0.153	-0.277	-0.205	0.053	-0.165	0.165	-0.174	-0.073	-0.2	0.092	-0.136	-0.098	0.43	-0.273	-0.203	0.1	-0.243	0.047	0.228	0.02	-0.295	-0.108	-0.312	-0.128	-0.174	-0.009	-0.213	-0.327	-0.245	-0.081	-0.079	-0.146	-0.098	-0.194	0.042	-0.206	-0.187	-0.171	-0.197	-0.198	-0.226
	gl	85	97	97	96	95	94	97	30	97	97	74	97	97	97	60	97	76	93	97	97	97	97	97	97	95	97	94	97	97	97	97	93	93	94	97	90	96	84	75	64	88	14	91	95	90	82	97	97
	p-value	0.34	0.005	0.004	0.438	0.23	0.035	0.009	0.403	0.005	0.041	0.65	0.102	0.103	0.085	0.575	0.047	0.421	0.188	0.337	< .001	0.006	0.044	0.325	0.016	0.645	0.023	0.845	0.003	0.289	0.002	0.205	0.091	0.93	0.037	< .001	0.018	0.427	0.47	0.207	0.435	0.066	0.877	0.047	0.067	0.103	0.073	0.05	0.025
Cu/Zn	Pearson (r)	-0.035	-0.28	-0.214	-0.061	0.059	-0.162	-0.256	-0.053	-0.287	-0.114	0.018	-0.095	0.129	-0.172	0.044	-0.222	0.092	-0.165	-0.104	0.566	-0.334	-0.139	0.099	-0.164	0.065	0.218	0.048	-0.264	-0.101	-0.276	-0.164	-0.207	-0.038	-0.196	-0.316	-0.178	-0.034	0.008	-0.013	-0.053	-0.168	0.01	-0.175	-0.159	-0.206	-0.213	-0.198	-0.17
	gl	85	97	97	96	95	94	97	30	97	97	74	97	97	97	60	97	76	93	97	97	97	97	97	97	95	97	94	97	97	97	97	93	93	94	97	90	96	84	75	64	88	14	91	95	90	82	97	97
	p-value	0.746	0.005	0.034	0.552	0.566	0.115	0.011	0.773	0.004	0.263	0.875	0.348	0.202	0.089	0.733	0.027	0.424	0.109	0.305	< .001	< .001	0.169	0.33	0.105	0.527	0.03	0.641	0.008	0.32	0.006	0.106	0.044	0.717	0.056	0.001	0.089	0.743	0.941	0.909	0.673	0.113	0.972	0.093	0.121	0.049	0.052	0.05	0.092
Fe/Cu	Pearson (r)	0.044	-0.035	0.376	0.113	0.381	0.058	0.015	-0.162	-0.049	0.069	-0.086	0.237	0.058	-0.095	-0.062	0.223	0.451	0.175	0.079	-0.283	0.172	-0.001	-0.128	0.125	-0.171	-0.152	-0.175	0.166	-0.027	0.185	0.208	0.091	0.204	0.06	0.272	0.165	-0.183	0.133	0.003	0.5	0.381	0.395	0.386	0.436	0.184	0.209	0.202	0.215
	gl	66	76	76	76	76	75	76	20	76	76	62	76	76	76	51	76	76	72	76	76	76	76	76	76	74	76	73	76	76	76	76	72	72	73	76	75	75	71	67	59	68	14	72	76	71	67	76	76
	p-value	0.724	0.758	< .001	0.326	< .001	0.614	0.893	0.471	0.669	0.547	0.497	0.037	0.614	0.406	0.657	0.05	< .001	0.136	0.491	0.012	0.132	0.99	0.263	0.274	0.14	0.184	0.133	0.146	0.812	0.105	0.068	0.441	0.081	0.608	0.016	0.151	0.112	0.264	0.979	< .001	0.001	0.13	< .001	< .001	0.119	0.084	0.076	0.058
Sn/Sb	Pearson (r)	-0.058	0.12	-0.193	-0.079	0.087	-0.141	0.038	-0.25	0.165	0.079	-0.055	-0.194	-0.079	0.027	-0.054	-0.155	-0.258	0.088	0.032	0.147	-0.065	-0.095	0.405	-0.18	-0.157	-0.107	-0.066	-0.185	0.551	-0.226	-0.13	-0.079	-0.172	0.285	-0.104	-0.187	-0.174	-0.159	-0.315	-0.213	-0.147	-0.414	-0.12	-0.147	-0.067	-0.183	-0.154	-0.154
	gl	85	97	97	96	95	94	97	30	97	97	74	97	97	97	60	97	76	93	97	97	97	97	97	97	95	97	94	97	97	97	97	93	93	94	97	90	96	84	75	64	88	14	91	95	90	82	97	97
	p-value	0.596	0.235	0.055	0.441	0.394	0.17	0.708	0.168	0.102	0.438	0.639	0.054	0.438	0.792	0.676	0.127	0.023	0.395	0.751	0.147	0.525	0.348	< .001	0.075	0.124	0.293	0.525	0.067	< .001	0.024	0.201	0.447	0.095	0.005	0.306	0.074	0.087	0.145	0.005	0.086	0.166	0.111	0.252	0.151	0.523	0.097	0.129	0.127
La/Ce	Pearson (r)	-0.164	0.098	-0.296	-0.139	0.088	-0.172	-0.078	-0.171	0.161	-0.205	-0.205	-0.307	-0.144	-0.039	-0.11	-0.284	-0.226	-0.183	0.065	-0.198	-0.193	-0.286	-0.096	-0.312	-0.261	-0.187	-0.296	-0.271	-0.122	-0.23	-0.233	-0.016	-0.269	-0.155	-0.271	-0.121	-0.222	-0.247	-0.223	-0.13	-0.245	-0.455	-0.147	-0.155	-0.093	-0.169	-0.204	-0.242
	gl	82	93	93	92	91	90	93	29	93	93	70	93	93	93	58	93	72	93	93	93	93	93	93	93	91	93	93	93	93	93	93	93	93	93	93	87	92	82	73	63	84	14	87	91	86	78	93	93
	p-value	0.136	0.346	0.004	0.181	0.4	0.101	0.454	0.359	0.12	0.046	0.083	0.002	0.163	0.711	0.404	0.005	0.052	0.075	0.53	0.055	0.061	0.005	0.353	0.002	0.011	0.069	0.004	0.008	0.239	0.025	0.023	0.876	0.008	0.134	0.008	0.26	0.032	0.024	0.055	0.301	0.023	0.077	0.168	0.137	0.387	0.133	0.048	0.018
V/Ni	Pearson (r)	0.154	0.468	-0.159	0.085	0.09	0.114	0.422	-0.097	0.472	0.179	0.227	-0.02	0.138	0.661	-0.22	-0.081	-0.073	-0.015	-0.223	-0.049	-0.041	0.076	0.259	0.006	0.083	0.062	0.082	-0.025	0.127	-0.007	-0.026	0.136	0.067	0.11	0.015	-0.052	0.014	-0.177	-0.013	-0.207	-0.197	-0.369	-0.075	-0.145	-0.132	-0.111	-0.214	-0.186
	gl	85	97	97	96	95	94	97	30	97	97	74	97	97	97	60	97	76	93	97	97	97	97	97	97	95	97	94	97	97	97	97	93	93	94	97	90	96	84	75	64	88	14	91	95	90	82	97	97
	p-value	0.155	< .001	0.117	0.405	0.379	0.268	< .001	0.598	< .001	0.076	0.049	0.843	0.174	< .001	0.085	0.428	0.527	0.887	0.027	0.628	0.687	0.455	0.009	0.952	0.416	0.545	0.428	0.804	0.212	0.942	0.798	0.19	0.521	0.287	0.881	0.622	0.892	0.102	0.912	0.096	0.063	0.16	0.472	0.155	0.211	0.317	0.034	0.065
Pb/Cu	Pearson (r)	0.118	0.222	0.284	0.114	0.196	0.136	0.217	-0.222	0.244	0.171	-0.012	0.148	-0.103	0.13	-0.008	0.244	0.056	0.215	0.02	-0.421	0.339	0.158	0.037	0.233	-0.097	-0.198	-0.04	0.303	0.257	0.273	0.148	0.105	0.054	0.335	0.442	0.158	-0.062	0.119	0.01	0.232	0.268	0.147	0.257	0.295	0.145	0.161	0.176	0.215
	gl	85	97	97	96	95	94	97	30	97	97	74	97	97	97	60	97	76	93	97	97	97	97	97	97	95	97	94	97	97	97	97	93	93	94	97	90	96	84	75	64	88	14	91	95	90	82	97	97
	p-value	0.276	0.027	0.004	0.265	0.054	0.187	0.031	0.221	0.015	0.091	0.918	0.144	0.311	0.201	0.949	0.015	0.626	0.037	0.841	< .001	< .001	0.119	0.717	0.02	0.346	0.049	0.7	0.002	0.01	0.006	0.144	0.311	0.607	< .001	< .001	0.132	0.546	0.274	0.934	0.061	0.011	0.586	0.013	0.003	0.169	0.144	0.082	0.033
Cu/Ca	Pearson (r)	-0.144	0.064	0.021	-0.395	-0.455	0.197	0.033	-0.07	0.036	0.243	-0.049	0.178	0.047	0.139	0.029	0.203	0.09	0.2	0.028	0.673	0.271	0.271	0.274	0.153	0.117	0.416	0.36	0.179	0.323	0.25	0.108	0.099	0.098	0.295	0.217	0.096	0.079	0.165	0.144	-0.044	0.077	0.126	0.136	0.007	-0.069	0.114	0.147	0.191
	gl	85	96	96	96	95	94	96	29	96	96	73	96	96	96	60	96	76	92	96	96	96	96	96	96	94	96	93	96	96	96	96	92	92	93	96	89	95	84	75	64	87	14	90	94	90	81	96	96
	p-value	0.183	0.533	0.838	< .001	< .001	0.054	0.746	0.708	0.725	0.016	0.678	0.079	0.643	0.171	0.824	0.045	0.435	0.053	0.784	< .001	0.007	0.007	0.006	0.132	0.255	< .001	< .001	0.079	0.001	0.013	0.29	0.345	0.347	0.004	0.032	0.364	0.442	0.13	0.211	0.726	0.474	0.643	0.195	0.948	0.513	0.306	0.15	0.059
NO3-/EC	Pearson (r)	0.08	0.63	-0.371	0.163	0.05	0.016	0.599	0.362	0.582	0.061	-0.101	-0.246	-0.024	0.429	-0.147	-0.321	-0.3	-0.151	0.129	-0.16	-0.252	-0.091	0.273	-0.267	0.043	-0.063	-0.103	-0.245	0.023	-0.241	-0.173	0.011	-0.196	-0.035	-0.25	-0.013	0.038	-0.429	-0.196	-0.248	-0.292	-0.63	-0.211	-0.172	0.078	-0.161	-0.239	-0.325
	gl	85	97	97	96	95	94	97	30	97	97	74	97	97	97	60	97	76	93	97	97	97	97	97	97	95	97	94	97	97	97	97	93	93	94	97	90	96	84	75	64	88	14	91	95	90	82	97	97
	p-value	0.463	< .001	< .001	0.109	0.625	0.88	< .001	0.042	< .001	0.549	0.387	0.014	0.811	< .001	0.255	0.001	0.008	0.145	0.205	0.113	0.012	0.371	0.006	0.008	0.679	0.537	0.317	0.015	0.823	0.016	0.087	0.917	0.057	0.732	0.012	0.903	0.713	< .001	0.088	0.045	0.005	0.009	0.042	0.093	0.457	0.144	0.017	0.001
SO42-/NO3-	Pearson (r)	-0.26	-0.07	-0.35	-0.08	0.133	-0.389	-0.424	-0.057	0.121	-0.177	-0.2	-0.465	-0.153	-0.204	-0.149	-0.398	-0.274	-0.286	-0.108	-0.158	-0.252	-0.424	-0.161	-0.466	-0.266	-0.342	-0.437	-0.411	-0.219	-0.359	-0.309	-0.25	-0.308	-0.254	-0.4	-0.243	-0.193	-0.273	-0.415	-0.041	-0.207	0.089	-0.208	-0.227	-0.07	-0.246	-0.282	-0.305
	gl	85	97	97	96	95	94	97	30	97	97	74	97	97	97	60	97	76	93	97	97	97	97	97	97	95	97	94	97	97	97	97	93	93	94	97	90	96	84	75	64	88	14	91	95	90	82	97	97
	p-value	0.015	0.49	< .001	0.432	0.195	< .001	< .001	0.758	0.233	0.079	0.083	< .001	0.131	0.043	0.248	< .001	0.015	0.005	0.288	0.119	0.012	< .001	0.111	< .001	0.008	< .001	< .001	< .001	0.029	< .001	0.002	0.015	0.002	0.012	< .001	0.02	0.057	0.011	< .001	0.743	0.05	0.743	0.046	0.025	0.509	0.024	0.005	0.002
SO42-/EC	Pearson (r)	-0.109	0.365	-0.48	0.061	0.159	-0.277	0.02	0.337	0.546	-0.128	-0.153	-0.466	-0.129	0.11	-0.179	-0.466	-0.369	-0.297	0.087	-0.305	-0.32	-0.36	0.008	-0.485	-0.183	-0.277	-0.375	-0.436	-0.19	-0.408	-0.31	-0.137	-0.349	-0.224	-0.442	-0.213	-0.17	-0.506	-0.378	-0.231	-0.397	-0.503	-0.31	-0.305	-0.06	-0.331	-0.401	-0.448
	gl	85	97	97	96	95	94	97	30	97	97	74	97	97	97	60	97	76	93	97	97	97	97	97	97	95	97	94	97	97	97	97	93	93	94	97	90	96	84	75	64	88	14	91	95	90	82	97	97
	p-value	0.314	< .001	< .001	0.554	0.12	0.006	0.841	0.059	< .001	0.205	0.186	< .001	0.204	0.277	0.165	< .001	< .001	0.003	0.393	0.002	0.001	< .001	0.934	< .001	0.072	0.006	< .001	< .001	0.06	< .001	0.002	0.185	< .001	0.028	< .001	0.042	0.094	< .001	< .001	0.062	< .001	0.047	0.002	0.002	0.573	0.002	< .001	< .001
Lev/Cu	Pearson (r)	0.121	-0.071	0.313	0.037	0.291	-0.005	-0.049	-0.398	-0.071	0.061	-0.004	0.112	-0.109	-0.124	-0.036	0.041	-0.037	-0.06	-0.06	-0.386	-0.017	-0.021	-0.121	0.183	-0.217	-0.277	-0.222	0.159	-0.023	0.068	0.003	-0.126	-0.031	0.072	0.116	-0.001	-0.119	0.366	0.12	0.442	0.264	0.366	0.22	0.333	0.123	0.046	0.138	0.234
	gl	73	84	84	84	83	82	84	27	84	84	70	84	84	84	53	84	71	82	84	84	84	84	84	84	82	84	83	84	84	84	84	82	82	83	84	79	83	84	75	64	77	14	81	83	80	72	84	84
	p-value	0.302	0.515	0.003	0.734	0.007	0.967	0.653	0.032	0.519	0.576	0.976	0.304	0.319	0.254	0.793	0.704	0.756	0.59	0.581	< .001	0.878	0.846	0.268	0.092	0.047	0.01	0.041	0.143	0.831	0.531	0.977	0.255	0.779	0.514	0.289	0.994	0.279	< .001	0.3	< .001	0.019	0.163	0.046	0.002	0.272	0.695	0.206	0.03
Lev/EC	Pearson (r)	0.088	-0.174	-0.016	-0.066	0.004	-0.043	-0.176	-0.036	-0.176	-0.088	-0.133	0.07	-0.096	-0.146	-0.025	-0.253	-0.211	-0.305	-0.115	0.177	-0.277	-0.042	-0.057	0.015	-0.017	0.001	-0.028	-0.105	-0.123	-0.182	-0.179	-0.228	-0.19	-0.12	-0.179	-0.153	-0.061	0.335	0.188	0.096	-0.109	0.233	-0.12	-0.085	-0.14	-0.135	-0.067	-0.027
	gl	73	84	84	84	83	82	84	27	84	84	70	84	84	84	53	84	71	82	84	84	84	84	84	84	82	84	83	84	84	84	84	82	82	83	84	79	83	84	75	64	77	14	81	83	80	72	84	84
	p-value	0.455	0.109	0.882	0.544	0.973	0.698	0.105	0.852	0.106	0.418	0.264	0.522	0.38	0.181	0.856	0.019	0.073	0.005	0.293	0.104	0.01	0.704	0.601	0.894	0.876	0.991	0.798	0.337	0.261	0.094	0.099	0.037	0.084	0.275	0.1	0.174	0.579	0.002	0.101	0.442	0.339	0.385	0.28	0.441	0.21	0.251	0.54	0.806
Lev/Man	Pearson (r)	-0.18	-0.345	0.114	-0.065	0.255	-0.478	-0.434	-0.554	-0.235	0.214	-0.078	-0.154	-0.03	-0.366	0.059	-0.137	-0.039	-0.053	-0.14	0.22	-0.141	-0.243	-0.031	-0.171	-0.196	-0.302	-0.305	-0.213	0.03	-0.225	-0.14	-0.241	-0.08	-0.009	-0.191	-0.139	-0.027	0.294	-0.328	0.282	0.249	0.518	0.109	0.203	0.122	-0.088	0.024	0.011
	gl	65	75	75	75	74	73	75	25	75	75	64	75	75	75	47	75	67	73	75	75	75	75	75	75	73	75	74	75	75	75	75	73	73	74	75	74	74	75	75	63	69	14	73	75	71	67	75	75
	p-value	0.146	0.002	0.324	0.576	0.026	< .001	< .001	0.003	0.04	0.062	0.536	0.181	0.793	0.001	0.689	0.236	0.751	0.652	0.225	0.054	0.221	0.034	0.787	0.137	0.093	0.008	0.007	0.063	0.795	0.049	0.223	0.037	0.494	0.939	0.095	0.231	0.815	0.009	0.004	0.023	0.036	0.04	0.352	0.076	0.305	0.47	0.838	0.922
Cl-/Lev	Pearson (r)	0.126	0.294	-0.255	0.07	-0.047	0.407	0.28	0.577	0.163	-0.165	0.028	-0.197	0.061	0.279	-0.201	0.027	0.127	0.088	-0.019	-0.122	0.233	-0.111	0.08	-0.206	0.005	0.072	-0.012	-0.049	0.014	0.052	0.075	0.166	0.052	0.012	0.119	0.01	-0.089	-0.398	0.045	-0.224	-0.157	-0.609	0.02	-0.127	-0.057	0.136	-0.028	-0.11
	gl	71	82	82	82	81	82	82	27	82	82	68	82	82	82	52	82	70	80	82	82	82	82	82	82	80	82	81	82	82	82	82	80	80	81	82	77	81	82	73	63	75	14	79	81	78	71	82	82
	p-value	0.287	0.007	0.019	0.529	0.674	< .001	0.01	0.001	0.138	0.133	0.819	0.072	0.583	0.01	0.144	0.805	0.286	0.432	0.865	0.269	0.033	0.316	0.469	0.06	0.967	0.516	0.915	0.655	0.896	0.638	0.495	0.135	0.645	0.917	0.279	0.931	0.422	< .001	0.702	0.073	0.172	0.012	0.86	0.254	0.614	0.252	0.802	0.317
Lev/Pb	Pearson (r)	0.009	-0.325	0.145	-0.069	0.103	-0.17	-0.319	-0.153	-0.32	0.021	-0.071	0.065	-0.008	-0.299	0.031	-0.191	-0.052	-0.271	-0.083	0.168	-0.326	-0.152	-0.161	0.03	-0.105	-0.078	-0.146	-0.124	-0.23	-0.177	-0.142	-0.236	-0.076	-0.212	-0.276	-0.181	-0.088	0.42	0.102	0.218	0.031	0.319	0.005	0.074	-0.09	-0.069	0.056	0.106
	gl	73	84	84	84	83	82	84	27	84	84	70	84	84	84	53	84	71	82	84	84	84	84	84	84	82	84	83	84	84	84	84	82	82	83	84	79	83	84	75	64	77	14	81	83	80	72	84	84
	p-value	0.937	0.002	0.183	0.53	0.349	0.121	0.003	0.428	0.003	0.85	0.552	0.554	0.939	0.005	0.825	0.078	0.663	0.013	0.449	0.122	0.002	0.162	0.138	0.786	0.344	0.476	0.182	0.256	0.033	0.103	0.193	0.03	0.493	0.051	0.01	0.106	0.422	< .001	0.378	0.079	0.785	0.229	0.966	0.502	0.423	0.557	0.608	0.331
Lev/Sb	Pearson (r)	-0.044	-0.311	0.025	-0.128	0.122	-0.249	-0.353	-0.174	-0.291	-0.068	-0.158	-0.059	-0.087	-0.341	-0.093	-0.323	-0.218	-0.347	-0.118	0.087	-0.378	-0.252	-0.134	-0.122	-0.206	-0.157	-0.231	-0.269	-0.215	-0.385	-0.279	-0.364	-0.211	-0.223	-0.323	-0.285	-0.193	0.246	-0.041	0.078	-0.043	0.349	-0.123	-0.017	-0.039	-0.244	-0.111	-0.043
	gl	73	84	84	84	83	82	84	27	84	84	70	84	84	84	53	84	71	82	84	84	84	84	84	84	82	84	83	84	84	84	84	82	82	83	84	79	83	84	75	64	77	14	81	83	80	72	84	84
	p-value	0.706	0.004	0.821	0.242	0.264	0.022	< .001	0.366	0.007	0.532	0.184	0.589	0.423	0.001	0.499	0.002	0.064	0.001	0.28	0.423	< .001	0.019	0.219	0.264	0.06	0.149	0.033	0.012	0.047	< .001	0.009	< .001	0.054	0.04	0.002	0.01	0.077	0.022	0.723	0.532	0.708	0.186	0.267	0.875	0.727	0.036	0.311	0.696
Lev/Zn	Pearson (r)	0.129	-0.326	0.248	-0.074	0.057	-0.075	-0.247	-0.149	-0.359	0.028	-0.06	0.173	-0.072	-0.261	0.118	-0.192	-0.146	-0.286	-0.089	0.188	-0.402	0.016	-0.12	0.177	-0.044	-0.024	0.009	-0.034	-0.204	-0.167	-0.162	-0.301	-0.117	-0.151	-0.172	-0.107	-0.045	0.514	0.269	0.276	0.082	0.219	0.011	0.096	-0.063	-0.124	0.039	0.161
	gl	73	84	84	84	83	82	84	27	84	84	70	84	84	84	53	84	71	82	84	84	84	84	84	84	82	84	83	84	84	84	84	82	82	83	84	79	83	84	75	64	77	14	81	83	80	72	84	84
	p-value	0.272	0.002	0.021	0.498	0.607	0.5	0.022	0.442	< .001	0.797	0.614	0.11	0.513	0.015	0.391	0.076	0.219	0.008	0.417	0.084	< .001	0.885	0.27	0.103	0.692	0.823	0.935	0.759	0.06	0.125	0.137	0.005	0.287	0.167	0.112	0.343	0.685	< .001	0.018	0.025	0.471	0.416	0.923	0.38	0.576	0.294	0.722	0.139
SO42-/Zn	Pearson (r)	-0.173	0.26	-0.399	0.044	0.179	-0.308	-0.015	0.292	0.381	-0.088	-0.146	-0.493	-0.139	0.035	-0.162	-0.515	-0.365	-0.32	0.148	-0.293	-0.485	-0.425	-0.117	-0.467	-0.297	-0.335	-0.461	-0.464	-0.276	-0.423	-0.409	-0.238	-0.356	-0.319	-0.516	-0.134	-0.204	-0.451	-0.359	-0.19	-0.337	-0.473	-0.284	-0.244	-0.131	-0.336	-0.362	-0.39
	gl	85	97	97	96	95	94	97	30	97	97	74	97	97	97	60	97	76	93	97	97	97	97	97	97	95	97	94	97	97	97	97	93	93	94	97	90	96	84	75	64	88	14	91	95	90	82	97	97
	p-value	0.109	0.009	< .001	0.669	0.079	0.002	0.884	0.105	< .001	0.387	0.209	< .001	0.17	0.731	0.207	< .001	0.001	0.002	0.145	0.003	< .001	< .001	0.249	< .001	0.003	< .001	< .001	< .001	0.006	< .001	< .001	0.02	< .001	0.002	< .001	0.201	0.044	< .001	0.001	0.126	0.001	0.064	0.006	0.016	0.212	0.002	< .001	< .001
NO3-/Zn	Pearson (r)	0.018	0.484	-0.213	0.104	0.089	-0.019	0.538	0.312	0.376	0.119	-0.063	-0.226	-0.013	0.293	-0.046	-0.316	-0.239	-0.156	0.169	-0.175	-0.401	-0.11	0.144	-0.176	-0.038	-0.095	-0.146	-0.237	-0.093	-0.232	-0.256	-0.061	-0.156	-0.117	-0.297	0.051	0.018	-0.301	-0.12	-0.151	-0.177	-0.531	-0.137	-0.065	0.117	-0.14	-0.15	-0.201
	gl	85	97	97	96	95	94	97	30	97	97	74	97	97	97	60	97	76	93	97	97	97	97	97	97	95	97	94	97	97	97	97	93	93	94	97	90	96	84	75	64	88	14	91	95	90	82	97	97
	p-value	0.865	< .001	0.035	0.31	0.384	0.853	< .001	0.082	< .001	0.24	0.587	0.024	0.899	0.003	0.724	0.001	0.035	0.131	0.095	0.084	< .001	0.277	0.154	0.081	0.709	0.35	0.156	0.018	0.361	0.021	0.01	0.557	0.131	0.258	0.003	0.631	0.862	0.005	0.299	0.226	0.095	0.034	0.19	0.526	0.265	0.206	0.139	0.046
SO42-/Lev	Pearson (r)	-0.049	0.389	-0.441	0.121	0.067	-0.22	0.095	0.329	0.58	-0.077	-0.029	-0.445	-0.028	0.206	-0.157	-0.283	-0.256	-0.139	0.053	-0.263	-0.128	-0.186	0.134	-0.417	0.026	-0.129	-0.188	-0.323	-0.122	-0.294	-0.231	-0.001	-0.179	-0.119	-0.312	-0.084	-0.02	-0.541	-0.385	-0.317	-0.279	-0.54	-0.231	-0.239	0.138	-0.256	-0.337	-0.386
	gl	73	84	84	84	83	82	84	27	84	84	70	84	84	84	53	84	71	82	84	84	84	84	84	84	82	84	83	84	84	84	84	82	82	83	84	79	83	84	75	64	77	14	81	83	80	72	84	84
	p-value	0.674	< .001	< .001	0.267	0.545	0.045	0.385	0.081	< .001	0.482	0.812	< .001	0.801	0.057	0.251	0.008	0.029	0.208	0.626	0.014	0.24	0.087	0.218	< .001	0.815	0.236	0.085	0.002	0.264	0.006	0.033	0.99	0.103	0.278	0.003	0.456	0.858	< .001	< .001	0.009	0.013	0.031	0.036	0.027	0.216	0.028	0.001	< .001
NO3-/Lev	Pearson (r)	-0.035	0.544	-0.411	0.163	0.027	-0.065	0.494	0.432	0.54	-0.007	-0.058	-0.412	0.025	0.356	-0.168	-0.222	-0.177	-0.023	0.062	-0.247	-0.121	-0.15	0.221	-0.386	0.043	-0.09	-0.145	-0.271	-0.03	-0.209	-0.163	0.099	-0.103	-0.047	-0.227	0.093	0.048	-0.555	-0.332	-0.298	-0.18	-0.591	-0.14	-0.128	0.196	-0.12	-0.22	-0.326
	gl	73	84	84	84	83	82	84	27	84	84	70	84	84	84	53	84	71	82	84	84	84	84	84	84	82	84	83	84	84	84	84	82	82	83	84	79	83	84	75	64	77	14	81	83	80	72	84	84
	p-value	0.763	< .001	< .001	0.134	0.805	0.555	< .001	0.019	< .001	0.952	0.626	< .001	0.816	< .001	0.22	0.04	0.133	0.833	0.57	0.022	0.268	0.168	0.041	< .001	0.695	0.409	0.186	0.012	0.785	0.053	0.134	0.37	0.351	0.672	0.035	0.411	0.66	< .001	0.003	0.015	0.113	0.016	0.207	0.244	0.077	0.307	0.042	0.002
Lev/OM	Pearson (r)	0.175	-0.24	0.147	-0.097	-0.037	-0.002	-0.129	-0.295	-0.298	0.006	0.008	0.227	-0.085	-0.18	0.247	-0.026	-0.141	-0.172	-0.139	0.307	-0.137	0.146	0.006	0.227	0.105	0.057	0.135	0.141	0.041	0.001	-0.006	-0.185	-0.096	0.052	0.041	-0.023	0.103	0.637	0.281	0.295	0.111	0.381	0.014	0.077	-0.056	-0.033	0.101	0.17
	gl	73	84	84	84	83	82	84	27	84	84	70	84	84	84	53	84	71	82	84	84	84	84	84	84	82	84	83	84	84	84	84	82	82	83	84	79	83	84	75	64	77	14	81	83	80	72	84	84
	p-value	0.132	0.026	0.176	0.374	0.738	0.989	0.235	0.12	0.005	0.955	0.945	0.035	0.436	0.098	0.069	0.815	0.235	0.117	0.201	0.004	0.21	0.181	0.954	0.036	0.34	0.599	0.218	0.196	0.711	0.99	0.953	0.092	0.386	0.637	0.707	0.835	0.347	< .001	0.013	0.016	0.328	0.145	0.899	0.486	0.619	0.778	0.354	0.119
K+/Lev	Pearson (r)	0.004	0.022	0.007	0.38	0.312	-0.154	-0.045	0.366	0.118	0.014	0.015	-0.196	0.012	-0.013	-0.171	-0.182	-0.046	-0.031	0.006	-0.275	-0.218	-0.24	-0.098	-0.215	-0.03	-0.259	-0.272	-0.27	-0.163	-0.226	-0.163	-0.021	-0.049	-0.164	-0.239	-0.029	-0.11	-0.455	-0.323	-0.214	-0.105	-0.569	-0.087	-0.063	-0.034	-0.18	-0.203	-0.216
	gl	73	84	84	84	83	82	84	27	84	84	70	84	84	84	53	84	71	82	84	84	84	84	84	84	82	84	83	84	84	84	84	82	82	83	84	79	83	84	75	64	77	14	81	83	80	72	84	84
	p-value	0.97	0.844	0.949	< .001	0.004	0.162	0.681	0.051	0.279	0.899	0.9	0.07	0.914	0.907	0.213	0.093	0.696	0.779	0.959	0.01	0.044	0.026	0.367	0.047	0.787	0.016	0.012	0.012	0.134	0.037	0.133	0.853	0.657	0.134	0.027	0.797	0.316	< .001	0.004	0.085	0.357	0.021	0.435	0.567	0.759	0.125	0.061	0.046
BaP/(BaP+BeP)	Pearson (r)	0.034	0.041	0.302	0.094	-0.118	0.336	0.108	-0.236	-0.045	0.176	0.053	0.337	-0.105	0.102	0.124	0.254	0.11	0.11	0.074	0.123	0.137	0.323	-0.055	0.425	0.151	0.177	0.309	0.344	0.07	0.349	0.072	0.087	0.052	0.173	0.325	0.344	0.171	0.376	0.409	0.073	0.106	-0.015	0.126	0.056	-0.164	0.267	0.227	0.278
	gl	68	79	79	79	78	78	79	27	79	79	65	79	79	79	48	79	68	76	79	79	79	79	79	79	77	79	77	79	79	79	79	76	76	77	79	74	78	74	70	61	73	14	77	79	75	72	79	79
	p-value	0.781	0.715	0.006	0.402	0.295	0.002	0.338	0.219	0.692	0.116	0.668	0.002	0.349	0.366	0.39	0.022	0.366	0.34	0.511	0.272	0.221	0.003	0.627	< .001	0.183	0.113	0.006	0.002	0.537	0.001	0.525	0.451	0.653	0.128	0.003	0.002	0.129	< .001	< .001	0.57	0.366	0.957	0.269	0.621	0.155	0.021	0.042	0.012
Flt/(Flt+Pir)	Pearson (r)	-0.24	0.103	-0.167	-0.262	-0.198	0.31	-0.062	0.236	0.075	-0.095	-0.041	-0.068	-0.066	0.018	-0.124	0.038	0.1	0.163	0.01	0.029	0.276	0.03	0.109	-0.117	-0.1	0.072	0.114	0.005	0.142	0.176	0.036	0.202	0.012	0.234	0.092	0.047	-0.098	-0.05	0.193	-0.083	-0.247	-0.228	0.079	-0.334	-0.158	0.266	0.169	0.101
	gl	80	91	91	90	89	88	91	29	91	91	72	91	91	91	58	91	72	87	91	91	91	91	91	91	89	91	88	91	91	91	91	87	87	88	91	85	90	81	73	62	87	14	91	91	87	81	91	91
	p-value	0.03	0.327	0.11	0.012	0.06	0.003	0.556	0.202	0.476	0.363	0.731	0.52	0.53	0.865	0.344	0.714	0.395	0.127	0.925	0.781	0.007	0.778	0.296	0.266	0.346	0.492	0.283	0.959	0.175	0.092	0.735	0.057	0.914	0.026	0.381	0.665	0.354	0.653	0.096	0.514	0.02	0.396	0.454	0.001	0.139	0.015	0.104	0.337
InP/(InP+BPe)	Pearson (r)	0.226	-0.025	-0.051	0.179	0.046	0.058	-0.02	-0.13	-0.026	-0.045	0.132	0.22	0.044	0.086	0.322	-0.029	-0.021	-0.049	0.066	0.149	-0.171	0.105	0.105	0.044	0.208	0.151	0.141	0.005	-0.055	-0.078	-0.043	0.008	0.011	-0.044	-0.066	0.01	0.16	0.05	0.062	0.09	-0.032	-0.244	-0.042	-0.024	0.046	0.019	-0.083	0.021
	gl	85	97	97	96	95	94	97	30	97	97	74	97	97	97	60	97	76	93	97	97	97	97	97	97	95	97	94	97	97	97	97	93	93	94	97	90	96	84	75	64	88	14	91	95	90	82	97	97
	p-value	0.035	0.809	0.619	0.077	0.655	0.576	0.843	0.477	0.8	0.66	0.256	0.029	0.666	0.397	0.011	0.778	0.856	0.638	0.514	0.141	0.09	0.3	0.302	0.662	0.041	0.135	0.172	0.962	0.587	0.445	0.674	0.935	0.914	0.669	0.517	0.925	0.115	0.651	0.591	0.472	0.762	0.363	0.692	0.818	0.666	0.86	0.415	0.835
BaA/(BaA+Cri)	Pearson (r)	-0.057	0.051	-0.068	0.001	0.021	0.11	0.068	-0.024	0.029	-0.066	-0.146	-0.115	-0.113	0.125	-0.134	0.054	0.028	0.125	0.042	-0.068	0.214	-0.015	0.033	-0.089	-0.089	0.023	0	0.071	0.053	0.162	-0.006	0.003	-0.086	0.149	0.157	-0.048	-0.07	0.001	0.137	0.034	0.068	-0.288	0.109	0.031	-0.019	0.345	-0.044	-0.052
	gl	71	82	82	81	80	80	82	23	82	82	65	82	82	82	53	82	67	78	82	82	82	82	82	82	80	82	79	82	82	82	82	78	78	79	82	78	81	72	67	58	79	14	81	81	77	82	82	82
	p-value	0.631	0.647	0.537	0.992	0.852	0.326	0.541	0.91	0.796	0.549	0.237	0.3	0.307	0.257	0.331	0.627	0.82	0.268	0.703	0.539	0.051	0.894	0.768	0.42	0.424	0.833	0.998	0.523	0.631	0.14	0.959	0.98	0.447	0.185	0.154	0.671	0.527	0.992	0.263	0.799	0.545	0.279	0.328	0.782	0.869	0.001	0.692	0.638
LMW/HMW	Pearson (r)	-0.203	-0.132	-0.471	0.048	0.056	-0.302	-0.129	0.064	-0.138	-0.374	-0.17	-0.487	0.04	-0.23	-0.329	-0.34	-0.089	-0.265	-0.195	-0.137	-0.274	-0.397	-0.038	-0.517	-0.071	-0.162	-0.326	-0.424	-0.318	-0.388	-0.309	-0.204	-0.16	-0.38	-0.449	-0.175	-0.029	-0.408	-0.396	-0.098	-0.117	-0.121	-0.14	0.017	0.324	-0.249	-0.193	-0.391
	gl	85	97	97	96	95	94	97	30	97	97	74	97	97	97	60	97	76	93	97	97	97	97	97	97	95	97	94	97	97	97	97	93	93	94	97	90	96	84	75	64	88	14	91	95	90	82	97	97
	p-value	0.059	0.191	< .001	0.636	0.589	0.003	0.203	0.726	0.175	< .001	0.142	< .001	0.693	0.022	0.009	< .001	0.438	0.009	0.053	0.178	0.006	< .001	0.71	< .001	0.492	0.109	0.001	< .001	0.001	< .001	0.002	0.047	0.121	< .001	< .001	0.095	0.78	< .001	< .001	0.433	0.273	0.655	0.182	0.872	0.002	0.022	0.056	< .001
Pyr/BaP	Pearson (r)	-0.106	0.037	-0.318	0.144	0.29	-0.303	0.037	0.072	0.077	-0.124	0.062	-0.463	0.194	-0.045	-0.173	-0.194	-0.031	-0.107	-0.103	-0.12	-0.237	-0.401	0.157	-0.446	-0.075	-0.146	-0.355	-0.381	-0.126	-0.375	-0.091	-0.058	-0.006	-0.256	-0.385	-0.282	-0.077	-0.396	-0.419	-0.088	0.007	0.046	0.023	0.216	0.279	-0.359	-0.302	-0.393
	gl	68	79	79	79	78	78	79	27	79	79	65	79	79	79	48	79	68	76	79	79	79	79	79	79	77	79	77	79	79	79	79	76	76	77	79	74	78	74	70	61	73	14	77	79	75	72	79	79
	p-value	0.38	0.741	0.004	0.199	0.009	0.006	0.746	0.709	0.492	0.272	0.62	< .001	0.083	0.687	0.228	0.082	0.798	0.349	0.359	0.286	0.034	< .001	0.161	< .001	0.513	0.192	0.001	< .001	0.261	< .001	0.417	0.616	0.955	0.023	< .001	0.014	0.495	< .001	< .001	0.492	0.95	0.867	0.842	0.052	0.014	0.002	0.006	< .001
Pyr/BbF	Pearson (r)	-0.157	-0.021	-0.252	0.198	0.235	-0.301	-0.007	0.03	0.019	-0.15	-0.137	-0.353	0.012	-0.079	-0.263	-0.247	-0.033	-0.188	-0.095	-0.186	-0.209	-0.351	-0.045	-0.391	-0.106	-0.261	-0.36	-0.32	-0.211	-0.296	-0.205	-0.139	-0.139	-0.305	-0.303	-0.197	-0.066	-0.315	-0.375	0.02	0.108	0.154	0.106	0.328	0.302	-0.275	-0.244	-0.376
	gl	83	95	95	94	93	92	95	30	95	95	74	95	95	95	60	95	76	91	95	95	95	95	95	95	93	95	92	95	95	95	95	91	91	92	95	89	94	83	75	64	87	14	91	95	89	81	95	95
	p-value	0.151	0.834	0.013	0.053	0.022	0.003	0.943	0.869	0.85	0.141	0.238	< .001	0.905	0.443	0.039	0.015	0.775	0.071	0.355	0.069	0.039	< .001	0.659	< .001	0.309	0.01	< .001	0.001	0.038	0.003	0.044	0.182	0.185	0.003	0.003	0.061	0.526	0.003	< .001	0.874	0.316	0.569	0.311	0.001	0.004	0.012	0.016	< .001
Flt/BbF	Pearson (r)	-0.28	0.012	-0.418	0.043	0.147	-0.242	-0.089	0.169	0.052	-0.286	-0.218	-0.476	-0.032	-0.093	-0.308	-0.324	-0.016	-0.182	-0.113	-0.21	-0.154	-0.442	-0.073	-0.55	-0.202	-0.274	-0.42	-0.409	-0.228	-0.315	-0.234	-0.116	-0.197	-0.289	-0.334	-0.231	-0.175	-0.419	-0.388	-0.016	-0.034	0.032	0.077	0.113	0.187	-0.22	-0.301	-0.454
	gl	80	91	91	90	89	88	91	29	91	91	72	91	91	91	58	91	72	87	91	91	91	91	91	91	89	91	88	91	91	91	91	87	87	88	91	85	90	81	73	62	87	14	91	91	87	81	91	91
	p-value	0.011	0.91	< .001	0.684	0.163	0.022	0.398	0.362	0.622	0.005	0.062	< .001	0.763	0.376	0.017	0.002	0.891	0.088	0.282	0.044	0.141	< .001	0.487	< .001	0.054	0.008	< .001	< .001	0.028	0.002	0.024	0.279	0.065	0.006	0.001	0.031	0.095	< .001	< .001	0.898	0.751	0.905	0.462	0.281	0.079	0.045	0.003	< .001
BB	Pearson (r)	0.218	-0.012	0.791	0.095	-0.119	0.552	0.084	0.048	-0.086	0.359	0.007	0.708	-0.006	0.062	0.115	0.595	0.294	0.272	0.219	0.219	0.414	0.589	-0.11	0.872	0.185	0.206	0.461	0.779	0.16	0.72	0.575	0.271	0.289	0.328	0.705	0.308	0.143	0.728	0.809	0.363	0.486	-0.138	0.473	0.367	-0.069	0.481	0.553	0.657
	gl	60	69	69	69	68	67	69	23	69	69	57	69	69	69	41	69	58	67	69	69	69	69	69	69	67	69	68	69	69	69	69	67	67	68	69	67	68	67	64	58	63	12	66	69	65	59	69	69
	p-value	0.089	0.923	< .001	0.432	0.326	< .001	0.489	0.819	0.477	0.002	0.956	< .001	0.959	0.61	0.463	< .001	0.023	0.024	0.067	0.066	< .001	< .001	0.361	< .001	0.129	0.085	< .001	< .001	0.184	< .001	< .001	0.024	0.016	0.005	< .001	0.01	0.236	< .001	< .001	0.004	< .001	0.638	< .001	0.002	0.581	< .001	< .001	< .001
SF	Pearson (r)	-0.125	0.886	-0.064	-0.067	-0.041	0.211	0.678	-0.018	0.881	0.404	-0.124	-0.099	-0.065	0.514	-0.049	-0.036	-0.104	0.165	0.27	-0.137	0.093	0.128	0.297	-0.066	0.088	0.02	0.057	0.007	0.168	0.159	0.157	0.283	0.018	0.308	0.126	0.09	0.16	-0.169	-0.085	-0.115	-0.015	-0.229	0.178	0.079	0.151	0.185	0.095	0
	gl	67	77	77	77	77	75	77	18	77	77	55	77	77	77	48	77	60	75	77	77	77	77	77	77	75	77	76	77	77	77	77	75	75	76	77	70	76	67	60	53	69	13	71	75	73	66	77	77
	p-value	0.305	< .001	0.578	0.559	0.72	0.066	< .001	0.941	< .001	< .001	0.359	0.384	0.569	< .001	0.737	0.752	0.423	0.153	0.016	0.229	0.415	0.261	0.008	0.565	0.447	0.858	0.622	0.95	0.14	0.16	0.167	0.013	0.879	0.006	0.27	0.455	0.162	0.166	0.511	0.404	0.903	0.412	0.132	0.495	0.195	0.132	0.403	0.997
IN	Pearson (r)	0.292	0.657	0.017	0.024	-0.238	0.392	0.729	-0.104	0.594	0.441	0.224	0.294	0.236	0.918	0.272	0.341	0.071	0.398	0.635	0.211	0.259	0.453	0.584	0.318	0.393	0.427	0.503	0.322	0.543	0.305	0.168	0.449	0.279	0.476	0.357	0.223	0.275	-0.108	0.051	-0.179	-0.022	-0.398	-0.026	-0.069	-0.018	0.12	0.016	0.036
	gl	70	81	81	80	79	78	81	27	81	81	61	81	81	81	46	81	63	77	81	81	81	81	81	81	81	81	78	81	81	81	81	77	77	78	81	76	81	68	63	55	72	11	75	79	74	68	81	81
	p-value	0.013	< .001	0.878	0.83	0.033	< .001	< .001	0.592	< .001	< .001	0.078	0.007	0.032	< .001	0.061	0.002	0.573	< .001	< .001	0.056	0.018	< .001	< .001	0.003	< .001	< .001	< .001	0.003	< .001	0.005	0.13	< .001	0.013	< .001	< .001	0.05	0.012	0.372	0.685	0.184	0.852	0.178	0.824	0.541	0.875	0.322	0.885	0.747
VE1	Pearson (r)	-0.159	-0.162	0.519	0.192	0.355	-0.227	-0.152	-0.102	-0.077	0.425	-0.032	0.227	0.133	-0.242	0.097	0.147	0.235	0.171	0.077	0.141	-0.026	0.018	-0.007	0.164	-0.008	-0.202	-0.095	0.052	-0.094	-0.014	0.206	0.055	0.255	0.095	0.087	0.016	0.106	0.345	-0.183	0.364	0.429	0.354	0.391	0.439	0.204	0.192	0.348	0.299
	gl	77	85	85	84	83	82	85	26	85	85	63	85	85	85	52	85	64	82	85	85	85	85	85	85	83	85	83	85	85	85	85	82	82	83	85	78	84	72	64	56	77	11	80	83	79	72	85	85
	p-value	0.162	0.134	< .001	0.076	< .001	0.038	0.16	0.605	0.479	< .001	0.799	0.035	0.22	0.024	0.484	0.174	0.057	0.119	0.478	0.192	0.811	0.865	0.946	0.13	0.942	0.061	0.388	0.631	0.386	0.9	0.055	0.622	0.019	0.388	0.422	0.89	0.333	0.003	0.142	0.005	< .001	0.235	< .001	< .001	0.068	0.101	< .001	0.005
VE2	Pearson (r)	0.078	0.079	0.362	-0.048	-0.165	0.561	0.141	0.039	-0.001	0.33	0.237	0.376	0.374	0.133	0.067	0.811	0.677	0.681	0.43	0.206	0.876	0.509	0.161	0.479	0.277	0.343	0.412	0.733	0.418	0.804	0.605	0.555	0.697	0.553	0.801	0.332	0.326	0.325	0.293	0.1	0.432	0.095	0.476	0.333	0.077	0.602	0.513	0.439
	gl	74	85	85	84	83	82	85	26	85	85	66	85	85	85	50	85	65	81	85	85	85	85	85	85	83	85	82	85	85	85	85	81	81	82	85	79	84	72	65	57	78	13	81	84	78	73	85	85
	p-value	0.502	0.467	< .001	0.66	0.132	< .001	0.192	0.843	0.995	0.002	0.052	< .001	< .001	0.219	0.637	< .001	< .001	< .001	< .001	0.055	< .001	< .001	0.136	< .001	0.01	0.001	< .001	< .001	< .001	< .001	< .001	< .001	< .001	< .001	< .001	0.002	0.002	0.005	0.016	0.453	< .001	0.735	< .001	0.002	0.495	< .001	< .001	< .001
Na(tot)	Pearson (r)	1	-0.041	0.161	0.479	0.266	0.146	0.189	0.513	-0.057	0.154	0.141	0.224	0.062	0.135	0.26	0.088	-0.006	0.053	0	0.039	-0.007	0.168	0.059	0.296	0.233	-0.058	0.063	0.163	0.216	0.081	0.076	-0.046	0.057	0.118	0.115	-0.005	0.132	0.143	0.077	0.062	0.021	-0.17	-0.063	0.06	-0.063	-0.046	0.006	0.023
	gl	85	97	97	96	95	94	97	30	97	97	74	97	97	97	60	97	76	93	97	97	97	97	97	97	95	97	94	97	97	97	97	93	93	94	97	90	96	84	75	64	88	14	91	95	90	82	97	97
	p-value	< .001	0.69	0.112	< .001	0.008	0.154	0.06	0.003	0.576	0.129	0.223	0.026	0.541	0.184	0.042	0.385	0.958	0.609	0.996	0.703	0.947	0.097	0.564	0.003	0.022	0.57	0.541	0.106	0.032	0.428	0.454	0.657	0.584	0.251	0.259	0.964	0.195	0.19	0.505	0.619	0.846	0.529	0.546	0.56	0.554	0.679	0.95	0.821
SO4(tot)	Pearson (r)	0.048	0.909	-0.05	0.08	-0.008	0.159	0.663	0.102	1	0.505	-0.028	-0.039	-0.005	0.652	0.006	0.03	-0.138	0.178	0.189	-0.128	0.151	0.222	0.358	0.017	0.132	-0.02	0.066	0.083	0.301	0.153	0.098	0.306	0.014	0.373	0.177	0.149	0.188	-0.202	-0.142	-0.092	-0.001	-0.335	0.104	0.034	0.084	0.101	0.028	-0.04
	gl	85	97	97	96	95	94	97	30	97	97	74	97	97	97	60	97	76	93	97	97	97	97	97	97	95	97	94	97	97	97	97	93	93	94	97	90	96	84	75	64	88	14	91	95	90	82	97	97
	p-value	0.659	< .001	0.621	0.434	0.939	0.122	< .001	0.58	< .001	< .001	0.809	0.705	0.961	< .001	0.962	0.77	0.228	0.085	0.061	0.207	0.136	0.027	< .001	0.868	0.199	0.844	0.521	0.412	0.002	0.13	0.335	0.003	0.89	< .001	0.08	0.156	0.064	0.063	0.219	0.464	0.994	0.205	0.322	0.743	0.429	0.363	0.784	0.695
NH4(tot)	Pearson (r)	0.072	0.948	-0.13	-0.017	-0.012	0.277	0.736	0.057	0.888	0.466	-0.107	-0.206	-0.137	0.606	-0.172	-0.11	-0.154	0.016	0.067	-0.199	0.042	0.049	0.193	-0.125	-0.112	-0.234	-0.136	0.03	0.268	0.078	0.132	0.142	-0.129	0.326	0.106	0.085	0.077	-0.231	-0.046	-0.153	0.068	-0.315	0.168	0.072	0.081	0.166	0.08	-0.021
	gl	55	66	66	65	64	63	66	25	66	66	58	66	66	66	35	66	57	62	66	66	66	66	66	66	64	66	63	66	66	66	66	62	62	63	66	65	65	63	60	50	60	12	64	66	62	58	66	66
	p-value	0.597	< .001	0.292	0.889	0.923	0.025	< .001	0.779	< .001	< .001	0.417	0.093	0.264	< .001	0.31	0.372	0.243	0.899	0.589	0.103	0.733	0.691	0.114	0.309	0.371	0.055	0.278	0.811	0.027	0.53	0.284	0.262	0.308	0.008	0.39	0.493	0.534	0.064	0.72	0.278	0.601	0.272	0.177	0.559	0.523	0.205	0.514	0.867
NO3(tot)	Pearson (r)	-0.209	-0.219	0.25	-0.121	-0.189	-0.069	-0.05	-0.183	-0.215	-0.021	0.152	0.305	0.105	0.004	0.147	0.208	0.086	0.155	0.068	0.064	0.094	0.301	0.066	0.29	0.228	0.29	0.39	0.148	0.034	0.159	0.206	0.173	0.135	0.024	0.109	0.023	0.045	0.111	0.01	0.025	-0.032	0.255	-0.029	-0.03	-0.064	-0.07	-0.021	0.06
	gl	85	97	97	96	95	94	97	30	97	97	74	97	97	97	60	97	76	93	97	97	97	97	97	97	95	97	94	97	97	97	97	93	93	94	97	90	96	84	75	64	88	14	91	95	90	82	97	97
	p-value	0.052	0.03	0.012	0.237	0.064	0.504	0.624	0.316	0.032	0.839	0.19	0.002	0.301	0.97	0.255	0.039	0.455	0.133	0.501	0.528	0.356	0.003	0.515	0.004	0.025	0.004	< .001	0.145	0.74	0.116	0.041	0.093	0.191	0.815	0.283	0.825	0.659	0.308	0.93	0.841	0.764	0.341	0.783	0.773	0.546	0.53	0.835	0.555
Cl(tot)	Pearson (r)	-0.173	-0.182	0.069	-0.191	-0.229	0.066	-0.076	-0.19	-0.178	-0.068	0.131	0.135	0.068	-0.003	0.025	0.219	0.063	0.207	0.091	0.04	0.249	0.16	0.135	0.143	0.144	0.277	0.24	0.147	0.155	0.234	0.146	0.071	0.113	0.123	0.135	0.014	-0.009	0.044	0.036	-0.024	-0.098	0.201	-0.065	-0.097	-0.015	0.003	0.011	0.035
	gl	85	97	97	96	95	94	97	30	97	97	74	97	97	97	60	97	76	93	97	97	97	97	97	97	95	97	94	97	97	97	97	93	93	94	97	90	96	84	75	64	88	14	91	95	90	82	97	97
	p-value	0.109	0.071	0.498	0.06	0.024	0.524	0.452	0.298	0.079	0.502	0.259	0.183	0.506	0.975	0.846	0.029	0.584	0.044	0.371	0.693	0.013	0.113	0.182	0.159	0.16	0.006	0.018	0.147	0.125	0.02	0.149	0.496	0.277	0.234	0.184	0.892	0.93	0.685	0.754	0.851	0.358	0.455	0.537	0.347	0.888	0.978	0.918	0.731
Ca(tot)	Pearson (r)	0.436	-0.01	0.245	1	0.562	-0.044	0.123	0.499	0.096	0.275	0.172	0.221	0.216	0.108	0.071	0.128	0.098	0.029	-0.006	-0.009	-0.068	0.063	0.178	0.205	0.365	-0.093	0.069	0.059	0.029	0.051	0.116	0.072	0.201	-0.002	0.023	0	0.218	0.019	-0.035	0.086	0.044	-0.322	0.059	0.17	0.009	0.049	0.045	0.004
	gl	85	97	97	96	95	94	97	30	97	97	74	97	97	97	60	97	76	93	97	97	97	97	97	97	95	97	94	97	97	97	97	93	93	94	97	90	96	84	75	64	88	14	91	95	90	82	97	97
	p-value	< .001	0.921	0.015	< .001	< .001	0.668	0.224	0.004	0.346	0.006	0.137	0.028	0.032	0.287	0.582	0.208	0.391	0.777	0.95	0.933	0.506	0.537	0.078	0.041	< .001	0.361	0.502	0.56	0.778	0.619	0.254	0.486	0.051	0.988	0.819	0.998	0.031	0.863	0.762	0.493	0.68	0.224	0.574	0.097	0.934	0.655	0.659	0.972
K(tot)	Pearson (r)	0.175	-0.017	1	0.229	0.148	0.341	0.174	-0.047	-0.05	0.622	0.05	0.788	0.095	0.076	0.247	0.569	0.446	0.403	0.127	0.199	0.349	0.525	-0.01	0.806	0.205	0.083	0.366	0.648	0.261	0.599	0.454	0.33	0.442	0.417	0.63	0.277	0.223	0.709	0.502	0.483	0.609	0.538	0.567	0.578	0.126	0.455	0.555	0.663
	gl	85	97	97	96	95	94	97	30	97	97	74	97	97	97	60	97	76	93	97	97	97	97	97	97	95	97	94	97	97	97	97	93	93	94	97	90	96	84	75	64	88	14	91	95	90	82	97	97
	p-value	0.106	0.869	< .001	0.023	0.149	< .001	0.085	0.797	0.621	< .001	0.67	< .001	0.347	0.452	0.053	< .001	< .001	< .001	0.211	0.048	< .001	< .001	0.926	< .001	0.044	0.414	< .001	< .001	0.009	< .001	< .001	0.001	< .001	< .001	< .001	0.008	0.027	< .001	< .001	< .001	< .001	0.032	< .001	< .001	0.231	< .001	< .001	< .001
Mg(tot)	Pearson (r)	0.17	-0.068	0.205	0.566	1	-0.221	-0.048	0.188	0.052	0.166	0.255	0.003	0.299	-0.072	0.093	0.016	0.286	0.095	0.009	-0.169	-0.185	-0.208	0.077	-0.032	0.046	-0.271	-0.327	-0.132	-0.056	-0.133	0.053	0.046	0.245	-0.074	-0.118	-0.064	-0.009	-0.038	-0.245	0.312	0.064	0.164	0.147	0.237	0.049	-0.055	-0.043	-0.054
	gl	85	97	97	96	95	94	97	30	97	97	74	97	97	97	60	97	76	93	97	97	97	97	97	97	95	97	94	97	97	97	97	93	93	94	97	90	96	84	75	64	88	14	91	95	90	82	97	97
	p-value	0.115	0.504	0.042	< .001	< .001	0.03	0.634	0.303	0.608	0.1	0.026	0.974	0.003	0.481	0.474	0.878	0.011	0.359	0.928	0.095	0.067	0.039	0.45	0.754	0.655	0.007	0.001	0.193	0.582	0.189	0.599	0.656	0.017	0.475	0.245	0.543	0.931	0.728	0.032	0.011	0.548	0.544	0.161	0.02	0.641	0.62	0.676	0.595
NH3(g)	Pearson (r)	0.001	0.161	-0.068	0.149	0.193	-0.083	-0.051	-0.216	0.243	-0.065	0.045	-0.198	-0.091	-0.01	0.002	-0.114	-0.158	-0.077	-0.04	-0.169	-0.074	-0.151	-0.11	-0.161	-0.134	-0.241	-0.15	-0.175	0.002	-0.146	0.246	-0.077	-0.108	0.005	-0.112	-0.102	-0.012	-0.185	-0.188	-0.098	-0.115	-0.062	-0.06	-0.073	-0.118	-0.082	-0.025	-0.061
	gl	54	65	65	64	63	62	65	25	65	65	57	65	65	65	34	65	56	61	65	65	65	65	65	65	63	65	62	65	65	65	65	61	61	62	65	64	64	62	59	49	59	11	63	65	61	57	65	65
	p-value	0.993	0.194	0.587	0.232	0.124	0.515	0.68	0.279	0.048	0.602	0.734	0.108	0.465	0.935	0.989	0.357	0.238	0.55	0.748	0.171	0.551	0.221	0.374	0.194	0.288	0.049	0.238	0.157	0.985	0.24	0.045	0.548	0.399	0.968	0.366	0.413	0.923	0.144	0.147	0.496	0.379	0.841	0.632	0.556	0.357	0.537	0.841	0.624
HCl(g)	Pearson (r)	-0.181	-0.19	0.078	-0.195	-0.226	0.055	-0.089	-0.191	-0.182	-0.058	0.122	0.137	0.066	-0.011	0.035	0.218	0.068	0.206	0.091	0.054	0.254	0.159	0.13	0.141	0.144	0.271	0.237	0.146	0.15	0.233	0.146	0.066	0.113	0.122	0.136	0.012	0	0.061	0.027	-0.016	-0.087	0.431	-0.057	-0.089	-0.007	0.007	0.02	0.043
	gl	81	93	93	92	91	90	93	30	93	93	70	93	93	93	56	93	72	89	93	93	93	93	93	93	91	93	90	93	93	93	93	89	89	90	93	86	92	80	71	60	84	12	87	91	86	78	93	93
	p-value	0.102	0.065	0.453	0.06	0.029	0.604	0.391	0.296	0.078	0.58	0.308	0.187	0.524	0.915	0.797	0.034	0.568	0.05	0.38	0.603	0.013	0.123	0.209	0.172	0.168	0.008	0.023	0.157	0.146	0.023	0.159	0.535	0.286	0.247	0.19	0.913	0.999	0.588	0.821	0.899	0.424	0.123	0.594	0.397	0.949	0.954	0.851	0.681
HNO3(g)	Pearson (r)	-0.218	-0.229	0.265	-0.125	-0.186	-0.082	-0.065	-0.183	-0.221	-0.006	0.141	0.309	0.103	-0.006	0.164	0.207	0.092	0.154	0.068	0.082	0.096	0.301	0.059	0.289	0.23	0.284	0.387	0.147	0.027	0.158	0.206	0.169	0.137	0.023	0.111	0.02	0.058	0.136	0	0.036	-0.014	0.438	-0.018	-0.018	-0.056	-0.066	-0.01	0.071
	gl	81	93	93	92	91	90	93	30	93	93	70	93	93	93	56	93	72	89	93	93	93	93	93	93	91	93	90	93	93	93	93	89	89	90	93	86	92	80	71	60	84	12	87	91	86	78	93	93
	p-value	0.048	0.025	0.01	0.229	0.074	0.439	0.531	0.316	0.031	0.955	0.236	0.002	0.319	0.952	0.218	0.045	0.435	0.145	0.51	0.429	0.352	0.003	0.572	0.004	0.027	0.005	< .001	0.154	0.797	0.127	0.045	0.11	0.197	0.831	0.286	0.85	0.581	0.222	1	0.779	0.896	0.117	0.866	0.865	0.604	0.563	0.92	0.496
NANO3(s)	Pearson (r)	NaN	NaN	NaN	NaN	NaN	NaN	NaN	NaN	NaN	NaN	NaN	NaN	NaN	NaN	NaN	NaN	NaN	NaN	NaN	NaN	NaN	NaN	NaN	NaN	NaN	NaN	NaN	NaN	NaN	NaN	NaN	NaN	NaN	NaN	NaN	NaN	NaN	NaN	NaN	NaN	NaN	NaN	NaN	NaN	NaN	NaN	NaN	NaN
	gl	0	0	0	0	0	0	0	-2	0	0	0	0	0	0	0	0	0	0	0	0	0	0	0	0	0	0	0	0	0	0	0	0	0	0	0	0	0	0	0	0	0	-1	0	0	0	0	0	0
	p-value	NaN	NaN	NaN	NaN	NaN	NaN	NaN	NaN	NaN	NaN	NaN	NaN	NaN	NaN	NaN	NaN	NaN	NaN	NaN	NaN	NaN	NaN	NaN	NaN	NaN	NaN	NaN	NaN	NaN	NaN	NaN	NaN	NaN	NaN	NaN	NaN	NaN	NaN	NaN	NaN	NaN	NaN	NaN	NaN	NaN	NaN	NaN	NaN
NA2SO4(s)	Pearson (r)	-0.348	-0.602	-0.138	-0.379	-0.532	-0.485	-0.644	NaN	-0.022	0.698	-0.468	-0.268	0.079	-0.791	0.086	0.061	-0.474	0.254	-0.434	0.776	0.31	0.35	-0.37	-0.082	0.148	-0.067	0.868	0.206	-0.134	0.06	0.024	-0.04	-0.025	0.498	-0.119	-0.41	0.2	0.552	-0.138	-0.268	0.146	-0.184	-0.053	-0.074	0.623	0.749	0.779	0.624
	gl	3	3	3	3	3	3	3	-1	3	3	2	3	3	3	3	3	3	3	3	3	3	3	3	3	3	3	3	3	3	3	3	3	3	3	3	3	3	3	3	3	3	2	3	3	3	3	3	3
	p-value	0.566	0.282	0.825	0.529	0.356	0.408	0.241	NaN	0.972	0.19	0.532	0.663	0.9	0.111	0.891	0.922	0.419	0.68	0.465	0.123	0.612	0.563	0.54	0.896	0.812	0.915	0.056	0.74	0.83	0.923	0.969	0.95	0.968	0.393	0.849	0.493	0.747	0.334	0.825	0.663	0.814	0.816	0.933	0.906	0.262	0.145	0.121	0.261
NH4Cl(s)	Pearson (r)	-0.228	0.038	-0.207	-0.011	-0.51	-0.125	-0.389	NaN	0.157	0.502	-0.318	-0.189	-0.113	-0.461	-0.106	0.156	-0.323	0.392	-0.745	0.608	0.332	0.329	0.181	0	-0.098	0.081	0.779	0.234	0.648	0.179	0.104	-0.044	-0.046	0.793	0.131	-0.107	-0.136	0.481	-0.101	-0.294	0.161	-0.779	-0.029	-0.129	0.662	0.915	0.734	0.62
	gl	3	3	3	3	3	3	3	-2	3	3	3	3	3	3	3	3	3	3	3	3	3	3	3	3	3	3	3	3	3	3	3	3	3	3	3	3	3	3	3	3	3	1	3	3	3	3	3	3
	p-value	0.713	0.952	0.739	0.986	0.38	0.841	0.517	NaN	0.801	0.389	0.602	0.761	0.856	0.435	0.865	0.802	0.596	0.514	0.149	0.277	0.585	0.588	0.77	1	0.876	0.897	0.12	0.705	0.237	0.773	0.868	0.944	0.941	0.109	0.834	0.865	0.827	0.412	0.872	0.631	0.796	0.432	0.963	0.836	0.223	0.029	0.158	0.265
NH4NO3(s)	Pearson (r)	-0.437	-0.034	-0.004	-0.335	-0.442	-0.422	-0.52	NaN	0.265	0.77	-0.114	-0.074	0.316	-0.413	0.274	0.269	-0.177	0.395	-0.455	0.811	0.414	0.43	-0.071	0.067	0.301	0.113	0.778	0.333	-0.076	0.239	0.26	0.146	0.151	0.514	0.064	-0.225	0.256	0.632	-0.121	-0.105	0.314	-0.084	0.127	0.103	0.632	0.745	0.814	0.65
	gl	4	4	4	4	4	4	4	-1	4	4	3	4	4	4	4	4	4	4	4	4	4	4	4	4	4	4	4	4	4	4	4	4	4	4	4	4	4	4	4	4	4	2	4	4	4	4	4	4
	p-value	0.386	0.95	0.993	0.517	0.38	0.404	0.29	NaN	0.611	0.074	0.855	0.89	0.542	0.416	0.599	0.607	0.737	0.438	0.365	0.05	0.415	0.395	0.894	0.9	0.563	0.831	0.068	0.519	0.886	0.648	0.618	0.783	0.775	0.297	0.905	0.668	0.625	0.178	0.819	0.843	0.545	0.916	0.811	0.845	0.178	0.089	0.049	0.163
NH42SO4(s)	Pearson (r)	-0.527	0.288	0.343	-0.952	-0.289	-0.462	-0.372	NaN	0.513	0.722	0.519	0.317	0.679	0.015	0.79	0.229	-0.555	0.164	0.452	0.867	0.01	0.312	-0.134	0.147	0.747	-0.102	0.446	-0.029	-0.391	-0.057	0.026	0.098	0.225	0.18	-0.05	-0.928	0.89	-0.05	-0.71	-0.059	0.193	0.015	0.305	0.372	0.577	-0.372	0.354	0.348
	gl	3	3	3	3	3	3	3	0	3	3	1	3	3	3	3	3	2	3	3	3	3	3	3	3	3	3	3	3	3	3	3	3	3	3	3	2	3	2	2	2	3	1	3	3	3	2	3	3
	p-value	0.362	0.638	0.572	0.012	0.637	0.434	0.538	NaN	0.377	0.168	0.653	0.603	0.208	0.981	0.112	0.711	0.445	0.793	0.445	0.057	0.988	0.609	0.83	0.813	0.147	0.871	0.452	0.964	0.515	0.928	0.967	0.876	0.716	0.772	0.936	0.072	0.043	0.95	0.29	0.941	0.756	0.991	0.617	0.537	0.309	0.628	0.559	0.566
CaSO4(s)	Pearson (r)	0.436	0.005	0.261	0.99	0.558	-0.037	0.127	0.467	0.115	0.297	0.181	0.237	0.217	0.118	0.089	0.135	0.098	0.039	-0.009	-0.012	-0.059	0.079	0.181	0.219	0.366	-0.094	0.067	0.068	0.042	0.061	0.13	0.083	0.207	0.016	0.037	0.013	0.219	0.036	-0.035	0.086	0.059	-0.322	0.074	0.182	0.023	0.049	0.058	0.016
	gl	85	97	97	96	95	94	97	30	97	97	74	97	97	97	60	97	76	93	97	97	97	97	97	97	95	97	94	97	97	97	97	93	93	94	97	90	96	84	75	64	88	14	91	95	90	82	97	97
	p-value	< .001	0.965	0.009	< .001	< .001	0.72	0.209	0.007	0.256	0.003	0.118	0.018	0.031	0.244	0.493	0.183	0.391	0.708	0.926	0.906	0.563	0.435	0.072	0.029	< .001	0.354	0.514	0.503	0.682	0.55	0.199	0.424	0.044	0.876	0.716	0.9	0.03	0.741	0.762	0.493	0.578	0.224	0.481	0.074	0.826	0.655	0.568	0.875
K2SO4(s)	Pearson (r)	-0.166	0.075	0.166	-0.135	0.142	-0.274	-0.049	0.302	0.187	0.286	-0.133	0.14	0.108	-0.037	-0.056	-0.093	0.173	0.022	-0.086	0.24	-0.02	0.079	-0.003	-0.08	0.074	-0.126	-0.04	-0.138	-0.076	-0.04	0.069	0.309	0.089	0.025	-0.056	-0.017	0.183	-0.015	-0.408	0.086	0.086	0.634	0.281	0.178	-0.061	-0.048	0.197	0.201
	gl	27	28	28	28	28	27	28	7	28	28	23	28	28	28	21	28	27	27	28	28	28	28	28	28	27	28	27	28	28	28	28	27	27	27	28	27	27	25	25	25	25	4	27	28	27	25	28	28
	p-value	0.389	0.693	0.382	0.478	0.455	0.151	0.796	0.429	0.323	0.126	0.526	0.46	0.57	0.844	0.8	0.623	0.37	0.909	0.651	0.201	0.916	0.68	0.989	0.674	0.705	0.508	0.837	0.466	0.691	0.832	0.716	0.103	0.646	0.899	0.771	0.929	0.341	0.939	0.035	0.671	0.67	0.176	0.14	0.346	0.753	0.811	0.297	0.288
KNO3(s)	Pearson (r)	0.926	-0.644	-0.174	0.956	0.587	-0.001	-0.377	0.21	-0.311	-0.814	0.265	-0.434	0.196	-0.914	NaN	0.169	-0.096	-0.401	-0.532	-0.536	0.344	-0.771	0.416	-0.011	-0.792	-0.264	-0.516	0.598	-0.8	-0.649	-0.25	-0.688	0.125	-0.472	0.818	0.261	-0.302	0.901	0.849	0.796	0.895	NaN	0.051	0.759	0.987	0.021	-0.535	0.017
	gl	1	2	2	2	2	2	2	1	2	2	2	2	2	2	0	2	2	2	2	2	2	2	2	2	2	2	2	2	2	2	2	2	2	2	2	2	2	2	2	2	2	-2	2	2	2	2	2	2
	p-value	0.247	0.356	0.826	0.044	0.413	0.999	0.623	0.865	0.689	0.186	0.735	0.566	0.804	0.086	NaN	0.831	0.904	0.599	0.468	0.464	0.656	0.229	0.584	0.989	0.208	0.736	0.484	0.402	0.2	0.351	0.75	0.312	0.875	0.528	0.182	0.739	0.698	0.099	0.151	0.204	0.105	NaN	0.949	0.241	0.013	0.979	0.465	0.983
KCl(s)	Pearson (r)	0.676	-0.202	-0.077	-0.899	0.071	0.849	-0.972	NaN	-0.152	-0.093	0.864	-0.267	-0.785	-0.372	0.932	0.486	-0.202	0.354	-0.454	-0.653	0.102	-0.313	-0.774	-0.172	-0.47	-0.608	-0.49	-0.425	0.731	0.221	0.092	-0.106	-0.053	0.34	0.023	0.359	-0.237	-0.125	-0.9	-0.557	-0.23	NaN	0.051	-0.1	-0.163	0.02	0.096	-0.3
	gl	3	3	3	3	3	3	3	0	3	3	2	3	3	3	2	3	2	3	3	3	3	3	3	3	3	3	3	3	3	3	3	3	3	3	3	3	3	3	2	2	3	-2	3	3	2	2	3	3
	p-value	0.21	0.745	0.902	0.038	0.91	0.069	0.005	NaN	0.807	0.881	0.136	0.664	0.116	0.537	0.068	0.407	0.798	0.559	0.442	0.232	0.871	0.608	0.125	0.782	0.425	0.277	0.402	0.475	0.161	0.721	0.883	0.865	0.933	0.576	0.97	0.553	0.701	0.842	0.1	0.443	0.71	NaN	0.935	0.872	0.837	0.98	0.878	0.623
MgSO4(s)	Pearson (r)	-0.44	-0.128	-0.153	-0.43	-0.444	-0.455	-0.574	NaN	0.094	0.608	-0.191	-0.294	0.121	-0.556	0.144	0.072	-0.395	0.181	-0.542	0.724	0.167	0.186	-0.191	-0.137	0.224	-0.14	0.662	0.08	-0.155	0.011	0.011	-0.092	-0.058	0.493	-0.153	-0.418	0.267	0.454	-0.3	-0.181	0.124	-0.287	-0.001	-0.025	0.733	0.664	0.644	0.562
	gl	4	4	4	4	4	4	4	-1	4	4	3	4	4	4	4	4	4	4	4	4	4	4	4	4	4	4	4	4	4	4	4	4	4	4	4	4	4	4	4	4	4	2	4	4	4	4	4	4
	p-value	0.383	0.81	0.773	0.395	0.378	0.364	0.234	NaN	0.859	0.201	0.759	0.572	0.82	0.252	0.785	0.892	0.439	0.731	0.266	0.104	0.751	0.725	0.718	0.796	0.669	0.792	0.152	0.88	0.77	0.983	0.983	0.863	0.914	0.321	0.772	0.41	0.609	0.366	0.563	0.732	0.815	0.713	0.998	0.963	0.098	0.151	0.168	0.246
H+(l)	Pearson (r)	0.125	0.412	0.132	-0.134	-0.281	0.508	0.676	-0.069	0.254	0.308	0.069	0.261	0.17	0.627	0.118	0.39	0.195	0.444	0.14	0.233	0.458	0.493	0.413	0.361	0.243	0.5	0.535	0.376	0.389	0.46	0.247	0.383	0.302	0.444	0.516	0.191	0.209	0.153	0.298	0.002	0.184	0.348	0.253	0.189	0.138	0.289	0.239	0.196
	gl	81	93	93	92	91	90	93	30	93	93	70	93	93	93	56	93	72	89	93	93	93	93	93	93	91	93	90	93	93	93	93	89	89	90	93	86	92	80	71	60	84	12	87	91	86	78	93	93
	p-value	0.261	< .001	0.201	0.197	0.006	< .001	< .001	0.706	0.013	0.002	0.565	0.011	0.099	< .001	0.378	< .001	0.095	< .001	0.177	0.023	< .001	< .001	< .001	< .001	0.019	< .001	< .001	< .001	< .001	< .001	0.016	< .001	0.004	< .001	< .001	0.075	0.043	0.169	0.01	0.99	0.089	0.222	0.017	0.07	0.2	0.009	0.019	0.057
Na+(l)	Pearson (r)	0.996	-0.112	0.167	0.502	0.169	0.514	0.118	0.782	-0.102	0.088	0.285	0.301	0.265	0.082	0.301	0.14	-0.064	0.032	0.007	0.023	0.049	0.247	-0.028	0.347	0.394	0.113	0.224	0.179	0.103	0.227	0.122	0.045	0.145	0.103	0.152	0.008	0.25	0.112	0.26	0.047	-0.04	-0.794	-0.048	0.003	-0.049	-0.013	0.061	0.091
	gl	58	60	60	60	60	59	60	16	60	60	39	60	60	60	42	60	43	60	60	60	60	60	60	60	59	60	60	60	60	60	60	60	60	60	60	54	59	50	41	35	55	4	55	58	56	47	60	60
	p-value	< .001	0.387	0.194	< .001	0.19	< .001	0.36	< .001	0.432	0.496	0.071	0.017	0.037	0.525	0.047	0.278	0.675	0.806	0.958	0.859	0.703	0.053	0.827	0.006	0.002	0.382	0.08	0.164	0.425	0.076	0.347	0.73	0.262	0.425	0.238	0.955	0.052	0.43	0.093	0.782	0.768	0.06	0.725	0.984	0.714	0.93	0.639	0.483
NH4+(l)	Pearson (r)	0.071	0.999	-0.022	-0.026	-0.132	0.418	0.856	0.124	0.906	0.508	-0.065	0.011	-0.043	0.727	-0.03	0.094	-0.084	0.197	0.171	-0.071	0.199	0.277	0.344	0.087	0.093	0.033	0.151	0.192	0.355	0.256	0.148	0.339	0.032	0.437	0.277	0.17	0.182	-0.12	0.066	-0.115	0.093	-0.392	0.232	0.109	0.143	0.265	0.167	0.099
	gl	84	96	96	95	94	93	96	30	96	96	73	96	96	96	59	96	75	92	96	96	96	96	96	96	94	96	93	96	96	96	96	92	92	93	96	89	95	83	74	63	87	13	90	94	89	81	96	96
	p-value	0.519	< .001	0.827	0.798	0.2	< .001	< .001	0.5	< .001	< .001	0.581	0.918	0.675	< .001	0.816	0.359	0.467	0.057	0.092	0.489	0.049	0.006	< .001	0.395	0.37	0.745	0.144	0.058	< .001	0.011	0.147	< .001	0.757	< .001	0.006	0.107	0.075	0.276	0.571	0.36	0.384	0.148	0.026	0.289	0.176	0.015	0.1	0.331
Cl(l)	Pearson (r)	0.481	0.334	0.313	0.2	0.007	1	0.583	0.436	0.059	0.21	0.119	0.372	0.286	0.421	0.398	0.459	0.278	0.35	0.139	0.004	0.389	0.386	0.05	0.468	0.221	0.185	0.278	0.532	0.216	0.575	0.379	0.279	0.391	0.313	0.507	0.182	0.155	0.255	0.654	-0.004	0.181	-0.455	0.38	0.327	0.04	0.503	0.543	0.538
	gl	58	60	60	60	60	59	60	16	60	60	39	60	60	60	42	60	43	60	60	60	60	60	60	60	59	60	60	60	60	60	60	60	60	60	60	54	59	50	41	35	55	4	55	58	56	47	60	60
	p-value	< .001	0.008	0.013	0.119	0.959	< .001	< .001	0.071	0.649	0.101	0.457	0.003	0.024	< .001	0.007	< .001	0.064	0.005	0.28	0.978	0.002	0.002	0.699	< .001	0.087	0.149	0.029	< .001	0.092	< .001	0.002	0.028	0.002	0.013	< .001	0.179	0.232	0.068	< .001	0.98	0.179	0.364	0.004	0.011	0.768	< .001	< .001	< .001
SO4(l)	Pearson (r)	-0.048	0.854	-0.203	-0.037	-0.032	0.098	0.536	0.064	0.949	0.34	-0.092	-0.2	-0.093	0.56	-0.087	-0.08	-0.227	0.079	0.18	-0.185	0.088	0.075	0.284	-0.132	-0.023	-0.08	-0.016	-0.032	0.248	0.03	0.01	0.197	-0.113	0.304	0.061	0.003	0.05	-0.296	-0.169	-0.129	-0.119	-0.477	-0.002	-0.089	0.038	0.022	-0.074	-0.124
	gl	83	95	95	94	93	92	95	29	95	95	72	95	95	95	58	95	75	91	95	95	95	95	95	95	93	95	92	95	95	95	95	91	91	92	95	88	94	82	74	63	86	13	89	93	88	81	95	95
	p-value	0.662	< .001	0.046	0.722	0.76	0.346	< .001	0.73	< .001	< .001	0.437	0.05	0.367	< .001	0.51	0.433	0.047	0.449	0.078	0.07	0.39	0.462	0.005	0.197	0.827	0.434	0.879	0.759	0.014	0.774	0.924	0.059	0.281	0.003	0.553	0.979	0.626	0.006	0.145	0.305	0.268	0.072	0.988	0.389	0.721	0.847	0.472	0.225
HSO4-(l)	Pearson (r)	0.152	0.766	-0.137	-0.135	-0.142	0.206	0.674	0.084	0.764	0.467	-0.063	-0.121	0.005	0.548	-0.134	-0.061	-0.039	0.089	0.047	-0.121	0.043	0.154	0.222	-0.061	0.1	-0.048	-0.09	0.109	0.122	0.154	0.007	0.205	0.001	0.215	0.111	0.322	0.208	-0.155	-0.026	-0.074	0.113	-0.362	0.147	0.141	0.148	0.136	0.046	-0.063
	gl	52	63	63	62	61	60	63	24	63	63	55	63	63	63	32	63	55	59	63	63	63	63	63	63	61	63	60	63	63	63	63	59	59	60	63	62	62	60	58	48	57	10	61	63	59	56	63	63
	p-value	0.272	< .001	0.277	0.286	0.268	0.108	< .001	0.682	< .001	< .001	0.641	0.338	0.971	< .001	0.452	0.629	0.775	0.494	0.711	0.338	0.731	0.221	0.075	0.631	0.435	0.702	0.485	0.386	0.331	0.222	0.955	0.113	0.994	0.093	0.38	0.009	0.099	0.229	0.845	0.609	0.395	0.247	0.251	0.263	0.255	0.308	0.713	0.615
NO3-(l)	Pearson (r)	0.092	0.821	0.09	0.117	-0.09	0.586	0.998	0.211	0.545	0.386	0.011	0.138	0.224	0.676	0.231	0.245	0.007	0.23	0.195	-0.072	0.279	0.327	0.439	0.216	0.137	0.252	0.222	0.242	0.295	0.282	0.187	0.336	0.181	0.303	0.276	0.118	0.167	-0.03	0.163	-0.078	0.083	-0.596	0.224	0.131	0.176	0.4	0.336	0.271
	gl	58	60	60	60	60	59	60	16	60	60	39	60	60	60	42	60	43	60	60	60	60	60	60	60	59	60	60	60	60	60	60	60	60	60	60	54	59	50	41	35	55	4	55	58	56	47	60	60
	p-value	0.487	< .001	0.487	0.364	0.487	< .001	< .001	0.401	< .001	0.002	0.944	0.285	0.08	< .001	0.131	0.055	0.962	0.072	0.129	0.579	0.028	0.009	< .001	0.092	0.291	0.048	0.083	0.058	0.02	0.026	0.145	0.008	0.16	0.017	0.03	0.385	0.199	0.834	0.296	0.644	0.539	0.212	0.094	0.317	0.187	0.004	0.008	0.033
K+(l)	Pearson (r)	0.368	0.182	0.829	0.277	0.115	0.613	0.347	0.083	0.088	0.65	0.066	0.649	0.078	0.206	0.318	0.611	0.422	0.484	0.172	0.162	0.462	0.555	0.019	0.763	0.234	0.087	0.335	0.708	0.388	0.704	0.446	0.341	0.43	0.52	0.714	0.309	0.273	0.649	0.645	0.328	0.574	0.214	0.596	0.521	0.105	0.595	0.649	0.669
	gl	75	87	87	86	85	84	87	27	87	87	67	87	87	87	53	87	67	84	87	87	87	87	87	87	85	87	85	87	87	87	87	84	84	85	87	81	86	77	68	57	79	10	82	85	80	75	87	87
	p-value	< .001	0.089	< .001	0.009	0.291	< .001	< .001	0.67	0.412	< .001	0.588	< .001	0.469	0.052	0.018	< .001	< .001	< .001	0.106	0.13	< .001	< .001	0.861	< .001	0.029	0.416	0.002	< .001	< .001	< .001	< .001	0.001	< .001	< .001	< .001	0.005	0.01	< .001	< .001	0.011	< .001	0.503	< .001	< .001	0.346	< .001	< .001	< .001
Mg2+(l)	Pearson (r)	0.175	-0.057	0.175	0.569	0.988	-0.205	-0.031	0.188	0.057	0.133	0.279	-0.01	0.301	-0.059	0.063	0.012	0.261	0.092	0.006	-0.196	-0.203	-0.214	0.087	-0.039	0.05	-0.257	-0.314	-0.144	-0.048	-0.141	0.045	0.046	0.234	-0.073	-0.133	-0.075	-0.021	-0.087	-0.238	0.245	0.014	-0.036	0.112	0.196	0.04	-0.066	-0.071	-0.077
	gl	84	96	96	95	94	93	96	30	96	96	73	96	96	96	59	96	75	92	96	96	96	96	96	96	94	96	93	96	96	96	96	92	92	93	96	89	95	83	74	63	87	13	90	94	89	81	96	96
	p-value	0.106	0.579	0.085	< .001	< .001	0.047	0.759	0.303	0.58	0.192	0.015	0.923	0.003	0.563	0.629	0.907	0.022	0.377	0.951	0.053	0.045	0.035	0.393	0.706	0.63	0.011	0.002	0.158	0.635	0.166	0.663	0.66	0.023	0.481	0.191	0.48	0.842	0.43	0.039	0.049	0.899	0.898	0.288	0.055	0.707	0.552	0.488	0.45
NH4+(aer)	Pearson (r)	0.068	1	-0.017	-0.026	-0.129	0.415	0.853	0.124	0.909	0.51	-0.064	0.014	-0.042	0.726	-0.013	0.095	-0.075	0.198	0.174	-0.067	0.204	0.279	0.343	0.089	0.098	0.031	0.148	0.196	0.353	0.258	0.152	0.341	0.035	0.432	0.281	0.176	0.19	-0.116	0.067	-0.106	0.102	-0.335	0.236	0.116	0.133	0.261	0.168	0.099
	gl	85	97	97	96	95	94	97	30	97	97	74	97	97	97	60	97	76	93	97	97	97	97	97	97	95	97	94	97	97	97	97	93	93	94	97	90	96	84	75	64	88	14	91	95	90	82	97	97
	p-value	0.531	< .001	0.869	0.8	0.207	< .001	< .001	0.5	< .001	< .001	0.58	0.89	0.677	< .001	0.922	0.351	0.511	0.055	0.085	0.512	0.043	0.005	< .001	0.383	0.342	0.758	0.15	0.052	< .001	0.01	0.134	< .001	0.734	< .001	0.005	0.093	0.061	0.287	0.563	0.395	0.341	0.205	0.023	0.259	0.207	0.017	0.096	0.332
Cl-(aer)	Pearson (r)	0.444	0.427	0.339	-0.038	-0.231	1	0.509	0.263	0.171	0.327	0.07	0.444	0.065	0.415	0.103	0.504	0.3	0.345	0.095	0.242	0.522	0.485	0.165	0.528	0.219	0.333	0.505	0.614	0.369	0.636	0.4	0.402	0.324	0.475	0.652	0.205	0.182	0.362	0.761	0.031	0.255	-0.227	0.484	0.221	0.053	0.614	0.556	0.543
	gl	85	97	97	96	95	94	97	30	97	97	74	97	97	97	60	97	76	93	97	97	97	97	97	97	95	97	94	97	97	97	97	93	93	94	97	90	96	84	75	64	88	14	91	95	90	82	97	97
	p-value	< .001	< .001	< .001	0.712	0.023	< .001	< .001	0.146	0.09	< .001	0.547	< .001	0.525	< .001	0.426	< .001	0.008	< .001	0.348	0.016	< .001	< .001	0.103	< .001	0.031	< .001	< .001	< .001	< .001	< .001	< .001	< .001	0.001	< .001	< .001	0.05	0.073	< .001	< .001	0.808	0.015	0.398	< .001	0.03	0.613	< .001	< .001	< .001
NO3-(aer)	Pearson (r)	0.254	0.853	0.174	0.112	-0.099	0.502	1	0.162	0.663	0.545	0.025	0.238	0.074	0.775	0.122	0.272	0.061	0.327	0.175	0.036	0.266	0.448	0.413	0.331	0.244	0.189	0.33	0.359	0.44	0.396	0.257	0.4	0.197	0.483	0.428	0.246	0.271	0.037	0.197	-0.079	0.211	-0.241	0.294	0.256	0.173	0.319	0.255	0.202
	gl	85	97	97	96	95	94	97	30	97	97	74	97	97	97	60	97	76	93	97	97	97	97	97	97	95	97	94	97	97	97	97	93	93	94	97	90	96	84	75	64	88	14	91	95	90	82	97	97
	p-value	0.018	< .001	0.085	0.27	0.333	< .001	< .001	0.375	< .001	< .001	0.829	0.018	0.465	< .001	0.345	0.007	0.594	0.001	0.084	0.723	0.008	< .001	< .001	< .001	0.016	0.061	0.001	< .001	< .001	< .001	0.01	< .001	0.055	< .001	< .001	0.018	0.007	0.733	0.087	0.528	0.046	0.368	0.004	0.012	0.099	0.003	0.011	0.045
H2O(l)	Pearson (r)	0.044	0.88	-0.168	-0.049	-0.105	0.339	0.781	0.192	0.74	0.307	-0.124	-0.142	-0.069	0.553	-0.07	-0.023	-0.127	0.072	0.133	-0.123	0.076	0.128	0.264	-0.057	0.017	-0.04	0.032	0.06	0.254	0.102	0.026	0.198	-0.07	0.274	0.129	0.154	0.13	-0.208	0.013	-0.145	0.025	-0.535	0.142	0.047	0.263	0.219	0.128	0.014
	gl	84	96	96	95	94	93	96	30	96	96	73	96	96	96	59	96	75	92	96	96	96	96	96	96	94	96	93	96	96	96	96	92	92	93	96	89	95	83	74	63	87	13	90	94	89	81	96	96
	p-value	0.69	< .001	0.099	0.636	0.309	< .001	< .001	0.293	< .001	0.002	0.29	0.163	0.497	< .001	0.593	0.822	0.27	0.493	0.192	0.228	0.457	0.208	0.009	0.574	0.866	0.699	0.755	0.558	0.012	0.316	0.803	0.056	0.503	0.007	0.206	0.144	0.205	0.056	0.91	0.248	0.813	0.04	0.177	0.649	0.012	0.046	0.208	0.893
Liquid	Pearson (r)	0.065	0.907	-0.112	0.009	-0.063	0.305	0.79	0.244	0.793	0.371	-0.138	-0.114	-0.078	0.563	-0.023	-0.027	-0.143	0.078	0.169	-0.154	0.077	0.131	0.266	-0.031	0.007	-0.076	0.012	0.072	0.253	0.105	0.041	0.183	-0.067	0.288	0.128	0.136	0.117	-0.198	-0.014	-0.121	0.043	-0.569	0.151	0.067	0.241	0.231	0.143	0.044
	gl	84	96	96	95	94	93	96	30	96	96	73	96	96	96	59	96	75	92	96	96	96	96	96	96	94	96	93	96	96	96	96	92	92	93	96	89	95	83	74	63	87	13	90	94	89	81	96	96
	p-value	0.55	< .001	0.272	0.929	0.54	0.003	< .001	0.179	< .001	< .001	0.239	0.262	0.443	< .001	0.859	0.79	0.214	0.456	0.097	0.131	0.454	0.199	0.008	0.76	0.947	0.459	0.908	0.484	0.012	0.302	0.689	0.078	0.524	0.005	0.211	0.2	0.254	0.069	0.904	0.338	0.688	0.027	0.15	0.514	0.021	0.036	0.159	0.668
Solid	Pearson (r)	0.099	-0.212	0.485	0.498	0.332	-0.216	-0.133	0.281	-0.098	0.397	0.027	0.35	0.124	-0.099	0.158	0.16	0.179	0.081	-0.033	0.212	0.021	0.134	0.019	0.266	0.2	-0.11	0.078	0.115	-0.018	0.081	0.159	0.022	0.201	0.045	0.115	0.024	0.216	0.332	-0.125	0.251	0.359	0.382	0.234	0.345	0.155	0.109	0.194	0.207
	gl	85	97	97	96	95	94	97	30	97	97	74	97	97	97	60	97	76	93	97	97	97	97	97	97	95	97	94	97	97	97	97	93	93	94	97	90	96	84	75	64	88	14	91	95	90	82	97	97
	p-value	0.362	0.035	< .001	< .001	< .001	0.034	0.19	0.119	0.333	< .001	0.818	< .001	0.221	0.332	0.22	0.113	0.117	0.437	0.747	0.035	0.838	0.186	0.849	0.008	0.05	0.278	0.451	0.255	0.859	0.427	0.117	0.834	0.051	0.666	0.258	0.823	0.033	0.002	0.277	0.042	< .001	0.144	0.024	< .001	0.14	0.323	0.055	0.04
RH	Pearson (r)	-0.098	0.134	-0.677	-0.195	-0.167	-0.012	0.037	-0.077	0.076	-0.536	-0.053	-0.549	-0.106	0.013	-0.187	-0.365	-0.274	-0.272	-0.056	-0.223	-0.238	-0.316	0.01	-0.487	-0.156	-0.018	-0.2	-0.351	-0.121	-0.325	-0.3	-0.157	-0.327	-0.279	-0.366	-0.087	-0.21	-0.472	-0.055	-0.288	-0.441	-0.558	-0.36	-0.426	-0.136	-0.235	-0.34	-0.456
	gl	85	97	97	96	95	94	97	30	97	97	74	97	97	97	60	97	76	93	97	97	97	97	97	97	95	97	94	97	97	97	97	93	93	94	97	90	96	84	75	64	88	14	91	95	90	82	97	97
	p-value	0.367	0.185	< .001	0.055	0.102	0.911	0.714	0.677	0.452	< .001	0.651	< .001	0.295	0.901	0.145	< .001	0.015	0.008	0.583	0.026	0.018	0.001	0.919	< .001	0.127	0.863	0.051	< .001	0.234	0.001	0.003	0.13	0.001	0.006	< .001	0.408	0.038	< .001	0.635	0.019	< .001	0.025	< .001	< .001	0.196	0.031	< .001	< .001
TEMP	Pearson (r)	-0.084	0.035	0.628	0.09	0.149	-0.073	0.089	-0.129	0.106	0.652	0.062	0.364	0.176	0.054	0.231	0.367	0.329	0.432	0.163	0.133	0.259	0.318	0.1	0.409	0.155	-0.019	0.095	0.314	0.211	0.31	0.281	0.209	0.365	0.335	0.344	0.097	0.267	0.303	-0.157	0.204	0.486	0.5	0.374	0.437	0.226	0.267	0.31	0.355
	gl	85	97	97	96	95	94	97	30	97	97	74	97	97	97	60	97	76	93	97	97	97	97	97	97	95	97	94	97	97	97	97	93	93	94	97	90	96	84	75	64	88	14	91	95	90	82	97	97
	p-value	0.441	0.731	< .001	0.376	0.147	0.481	0.383	0.48	0.296	< .001	0.592	< .001	0.082	0.598	0.071	< .001	0.003	< .001	0.108	0.19	0.01	0.001	0.326	< .001	0.13	0.85	0.356	0.002	0.036	0.002	0.005	0.042	< .001	< .001	< .001	0.359	0.008	0.005	0.173	0.101	< .001	0.048	< .001	< .001	0.03	0.014	0.002	< .001
I	Pearson (r)	0.234	0.111	0.411	0.262	0.19	0.191	0.188	0.108	0.12	0.367	0.1	0.411	0.085	0.18	0.166	0.305	0.039	0.194	0.142	0.018	0.232	0.31	0.083	0.411	0.194	0.103	0.253	0.315	0.208	0.261	0.213	0.188	0.231	0.256	0.362	0.016	0.126	0.193	0.084	0.028	0.193	0.362	0.178	0.23	0.085	0.107	0.193	0.258
	gl	82	94	94	93	92	91	94	30	94	94	72	94	94	94	58	94	73	90	94	94	94	94	94	94	92	94	91	94	94	94	94	90	90	91	94	87	93	81	74	62	85	14	88	92	87	80	94	94
	p-value	0.032	0.28	< .001	0.01	0.067	0.067	0.066	0.557	0.244	< .001	0.397	< .001	0.411	0.079	0.206	0.003	0.738	0.064	0.168	0.866	0.023	0.002	0.42	< .001	0.06	0.319	0.014	0.002	0.042	0.01	0.038	0.072	0.027	0.013	< .001	0.881	0.224	0.081	0.47	0.825	0.073	0.169	0.093	0.026	0.427	0.337	0.06	0.011
P	Pearson (r)	0.108	0.22	-0.44	-0.111	-0.124	0.123	0.046	-0.03	0.254	-0.257	-0.036	-0.252	-0.195	0.208	-0.178	-0.212	-0.31	-0.121	-0.072	-0.227	0.03	-0.126	0.024	-0.268	-0.165	-0.121	-0.142	-0.16	0.134	-0.13	-0.061	-0.118	-0.302	0.041	-0.069	-0.174	-0.263	-0.305	0.015	-0.274	-0.35	-0.685	-0.212	-0.325	-0.114	-0.184	-0.296	-0.306
	gl	82	94	94	93	92	91	94	30	94	94	72	94	94	94	58	94	73	90	94	94	94	94	94	94	92	94	91	94	94	94	94	90	90	91	94	87	93	81	74	62	85	14	88	92	87	80	94	94
	p-value	0.329	0.031	< .001	0.286	0.234	0.24	0.655	0.871	0.012	0.012	0.759	0.013	0.057	0.042	0.173	0.038	0.007	0.249	0.486	0.026	0.77	0.222	0.817	0.008	0.111	0.241	0.175	0.119	0.194	0.208	0.558	0.264	0.003	0.699	0.506	0.102	0.01	0.005	0.901	0.028	< .001	0.003	0.045	0.001	0.289	0.097	0.003	0.002
[truncated: 107 more columns]
