# Supplementary material for: Source apportionment and ecotoxicity of PM 2.5 pollution events in a major Southern Hemisphere megacity: influence of a biofuel-impacted fleet and biomass burning
Source: Copernicus journal article supplement (doi:10.5194/acp-25-4587-2025), 2025-04-30
Supplement: Supplementary file 1 [file acp-25-4587-2025-supplement.zip]

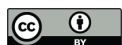

*Supplement of*

**Source apportionment and ecotoxicity of PM<sub>2.5</sub> pollution events in a major Southern Hemisphere megacity: influence of a biofuel-impacted fleet and biomass burning**

**Guilherme Martins Pereira et al.**

*Correspondence to:* Guilherme Martins Pereira ([guilherme.martins.pereira@usp.br](mailto:guilherme.martins.pereira@usp.br))

- [acp-25-4587-2025-supplement-title-page.pdf](#)
- [SI.pdf](#)
- [Table S4.xlsx](#)

The copyright of individual parts of the supplement might differ from the article licence.
